1 **The *Venturia inaequalis* effector repertoire is expressed in waves, and is dominated by expanded**  
2 **families with predicted structural similarity to avirulence proteins from other fungi**

3

4 Mercedes Rocafort<sup>1</sup>, Joanna K. Bowen<sup>2</sup>, Berit Hassing<sup>1</sup>, Murray P. Cox<sup>3</sup>, Brogan McGreal<sup>2</sup>, Silvia de la  
5 Rosa<sup>1</sup>, Kim M. Plummer<sup>4</sup>, Rosie E. Bradshaw<sup>3</sup> and Carl H. Mesarich<sup>1,\*</sup>

6

7 <sup>1</sup>Laboratory of Molecular Plant Pathology/Bioprotection Aotearoa, School of Agriculture and  
8 Environment, Massey University, Private Bag 11222, Palmerston North 4442, New Zealand.

9 <sup>2</sup>The New Zealand Institute for Plant and Food Research Limited, Mount Albert Research Centre,  
10 Auckland 1025, New Zealand.

11 <sup>3</sup>Bioprotection Aotearoa, School of Natural Sciences, Massey University, Private Bag 11222,  
12 Palmerston North 4442, New Zealand.

13 <sup>4</sup>Department of Animal, Plant and Soil Sciences, La Trobe University, AgriBio, Centre for  
14 AgriBiosciences, La Trobe University, Bundoora, Victoria 3086, Australia.

15 \*Corresponding author: Carl H. Mesarich ([c.mesarich@massey.ac.nz](mailto:c.mesarich@massey.ac.nz)). Postal address: School of  
16 Agriculture and Environment, Massey University, Private Bag 11222, Palmerston North 4442, New  
17 Zealand.

18

19 **Abstract**

20 **Background:** Scab, caused by the biotrophic fungus *Venturia inaequalis*, is the most economically  
21 important disease of apples worldwide. During infection, *V. inaequalis* occupies the subcuticular  
22 environment, where it secretes virulence factors, termed effectors, to promote host colonization.  
23 However, in the presence of corresponding host resistance proteins, these effectors are recognized as  
24 avirulence determinants to activate plant defences. To develop durable control strategies against  
25 scab, a better understanding of the molecular mechanisms underpinning subcuticular growth by

26 *V. inaequalis* is required. Likewise, more information is needed on the role that effectors play in  
27 activating, suppressing or circumventing resistance protein-mediated defences.

28 **Results:** We generated the first comprehensive RNA-seq transcriptome of *V. inaequalis* during  
29 colonization of apple. Analysis of this transcriptome revealed five *in planta* gene expression clusters  
30 or waves corresponding to three specific infection stages: early, mid and mid-late infection. Early  
31 infection was characterized by genes encoding plant cell wall-degrading enzymes (PCWDEs) and  
32 proteins associated with oxidative stress responses. Mid infection was characterized by genes  
33 encoding transporter proteins. Finally, mid-late infection was characterized by genes encoding  
34 PCWDEs and effector candidates (ECs), with most ECs belonging to expanded protein families. To gain  
35 insights into function, AlphaFold2 was used to predict the tertiary structures of proteinaceous ECs.  
36 Strikingly, many ECs were predicted to have structural similarity to avirulence proteins from other  
37 plant-pathogenic fungi, including members of the MAX, LARS, ToxA and FOLD structural effector  
38 families. In addition, several other ECs, including an EC family with amino acid similarity to the AvrLm6  
39 effector from *Leptosphaeria maculans*, were predicted to adopt a KP6/ferredoxin-like fold. Thus,  
40 proteins with a KP6/ferredoxin-like fold may represent yet another structural family of effectors  
41 shared among plant-pathogenic fungi.

42 **Conclusions:** Our study reveals the transcriptomic profile underpinning subcuticular growth by  
43 *V. inaequalis*, and reinforces the idea that fungal effectors share a limited number of structural folds.  
44 Importantly, our study also provides an enriched list of *V. inaequalis* ECs that can be investigated for  
45 roles in virulence and avirulence, and raises the possibility that apple resistance proteins can be  
46 engineered to recognize EC family folds or host components targeted by multiple EC family members.

47

#### 48 **Keywords**

49 *Venturia inaequalis*; apple scab fungus; biotrophic subcuticular pathogen; effectors and effector  
50 families; virulence and avirulence; RNA-seq transcriptome; AlphaFold2 protein tertiary structure  
51 predictions.

52

## 53 **Background**

54 Fungal pathogens are responsible for some of the most devastating diseases of crop plants  
55 worldwide, causing large economic losses, and threatening both food production and security [1].  
56 Resistance to these pathogens is largely governed by the plant immune system, and is based on the  
57 recognition of invasion patterns (IPs) by plant immune receptors [2]. At the plant cell surface, many  
58 of these immune receptors are pattern recognition receptors (PRRs) of the receptor-like protein (RLP)  
59 or receptor-like kinase (RLK) classes, which recognize conserved IPs known as microbe-associated  
60 molecular patterns (MAMPs). Following the recognition of these MAMPs, plant defence responses are  
61 initiated that slow or halt growth of the fungal pathogen [3-5]. To circumvent or suppress these  
62 defence responses, plant-pathogenic fungi must secrete a collection of virulence factors, termed  
63 effectors, into their hosts [6-8]. These effectors are typically proteinaceous, but can also be secondary  
64 metabolites and small RNAs [6]. In some cases, however, effectors can be recognized as IPs by  
65 extracellular PRRs or intracellular nucleotide-binding leucine-rich repeat (NLR) immune receptors,  
66 collectively referred to as resistance (R) proteins, to activate plant defences. Such effectors are termed  
67 avirulence (Avr) effectors because their recognition often renders the fungal pathogen unable to cause  
68 disease.

69 Scab (or black spot), caused by *Venturia inaequalis*, is the most economically important  
70 disease of apple (*Malus x domestica*) worldwide [9, 10]. Under favourable conditions, this disease can  
71 render the fruit unmarketable and cause a yield reduction of up to 70% [11-13]. During biotrophic host  
72 colonization, *V. inaequalis* exclusively colonizes the subcuticular environment without penetrating the  
73 underlying plant epidermal cells [9, 14, 15]. It is here that the fungus develops specialized infection  
74 structures, known as stromata and runner hyphae [9, 14]. Stromata give rise to asexual conidia, but  
75 are also likely required for nutrient acquisition and effector secretion [9, 14, 16], while runner hyphae  
76 enable the fungus to radiate out from the initial site of host penetration, acting as a base from which

77 additional stromata can be differentiated [14]. At the end of the season, in autumn, *V. inaequalis*  
78 switches to saprobic growth inside fallen leaves, where it undergoes sexual reproduction [9].

79 Scab disease is largely controlled through fungicides, which greatly accelerate the  
80 development of fungicide resistance in *V. inaequalis* [17]. Scab-resistant apple cultivars, developed  
81 through the incorporation of *R* genes, represent a more sustainable disease control option [12].  
82 However, as races of *V. inaequalis* have been identified that can overcome resistance in apple  
83 mediated by single *R* genes [12, 18], it is likely that multiple *R* genes will need to be stacked in these  
84 cultivars to provide durable disease resistance. For this to be successful, prior knowledge of the  
85 molecular mechanisms used by the fungus to overcome *R* gene-mediated resistance, including an  
86 understanding of how these mechanisms impact effector function and pathogen fitness, will be  
87 required. So far, however, there have been no publications describing the cloning of *Avr* effector genes  
88 from *V. inaequalis*. Crucially, the genomes of multiple *V. inaequalis* isolates have been sequenced [11,  
89 19-24] and bioinformatic studies have identified a large catalogue of effector candidates (ECs) from  
90 which *Avr* effectors can be identified [20]. Most of these ECs belong to expanded families comprising  
91 multiple members [20]. These include ECs of the *AvrLm6*-like family, which share amino acid sequence  
92 similarity to *AvrLm6* [16], an *Avr* effector from the fungal pathogen *Leptosphaeria maculans* (blackleg  
93 of canola) [25], as well as ECs of the *Ave1*-like family [20], which share amino acid sequence similarity  
94 to *Ave1*, an *Avr* effector from the fungal pathogen *Verticillium dahliae* (*Verticillium* wilt disease) [26].

95 To develop durable control strategies against scab disease, a better understanding of the  
96 molecular mechanisms underpinning subcuticular growth by *V. inaequalis* is also required. To date,  
97 subcuticular growth has been largely understudied, even though it is exhibited by many plant-  
98 pathogenic fungi, including other crop-infecting members of the *Venturia* genus [14, 27-29], as well  
99 as, for example, *Rhynchosporium* (scald disease of graminaceous plants) [30, 31] and *Diplocarpon* (e.g.  
100 rose black spot) [32, 33]. In recent years, host colonization by plant-pathogenic fungi has been studied  
101 by transcriptomic analysis [34-36]. However, comprehensive transcriptomic studies focusing on the  
102 subcuticular parasitic strategy are not available. Indeed, while previous expression data derived from

103 interactions between *V. inaequalis* and susceptible apple have been published [13, 20], these data  
104 have only been based on a limited number of infection time points with no biological replicates.

105 In this study, we provide the first comprehensive transcriptomic analysis of *V. inaequalis*  
106 during colonization of susceptible apple, and identify infection-related gene expression waves  
107 associated with general fungal and effector biology. Using recent advances in *de novo* protein folding  
108 algorithms, we also show that the EC repertoire of *V. inaequalis* is dominated by expanded families  
109 with predicted structural similarity to Avr proteins from other plant-pathogenic fungi. Collectively, this  
110 study furthers our understanding of subcuticular growth by *V. inaequalis*, and provides an enriched  
111 list of ECs from this fungus that can be investigated for potential roles in virulence and avirulence.

112

## 113 Results

### 114 Different stages of subcuticular host infection by *V. inaequalis* display distinct gene expression 115 profiles

116 To investigate changes in *V. inaequalis* gene expression during host colonization, we set up an  
117 infection time course involving detached leaves of susceptible apple cultivar *M. x domestica* ‘Royal  
118 Gala’. This time course involved six *in planta* time points (12 and 24 hours post-inoculation [hpi], as  
119 well as 2, 3, 5 and 7 days post-inoculation [dpi]), and was compared to growth of the fungus in culture  
120 at 7 dpi.

121 Analysis of leaf material from the infection time course by bright-field microscopy revealed  
122 that, at 12 hpi, conidia of *V. inaequalis* had germinated and formed appressoria (**Fig. 1A**). These  
123 appressoria were produced at the end of germ tubes or directly from conidia and were frequently  
124 surrounded by extracellular matrix (ecm) (**Fig. 1A**). At 24 hpi, primary hyphae had developed,  
125 indicating that subcuticular colonization was underway. Then, by 2 and 3 dpi, *V. inaequalis* had  
126 developed subcuticular runner hyphae from stromata, and stromata had undergone a rapid expansion  
127 in size through non-polar division (**Fig. 1A**). By 5 dpi, fungal biomass had accumulated extensively in  
128 the subcuticular environment and more stromata had started to develop from runner hyphae (**Fig.**

129 **1A**). Often, these stomata had formed conidiophores, from which conidia had developed (**Fig. 1A**).  
130 Finally, at 7 dpi, conidia of *V. inaequalis* had started to rupture through the plant cuticle (**Fig. 1A**) and,  
131 at this time point, the first macroscopic olive-brown lesions, indicative of heavy sporulation, were  
132 apparent. This represented the end of the biotrophic infection stage, as detached apple leaves had  
133 started to decay after this time point.

134 Inspection of the RNA-seq data revealed that the percentage of reads mapping to the  
135 *V. inaequalis* genome [20] increased as the infection time course progressed (**Additional file 1: Table**  
136 **S1**). Furthermore, the biological replicates clustered robustly within time points, and a clear distinction  
137 between the early and mid-late infection stages, as well as between the *in planta* and in-culture  
138 growth conditions, was observed (**Fig. 1B**).

139

**A.**

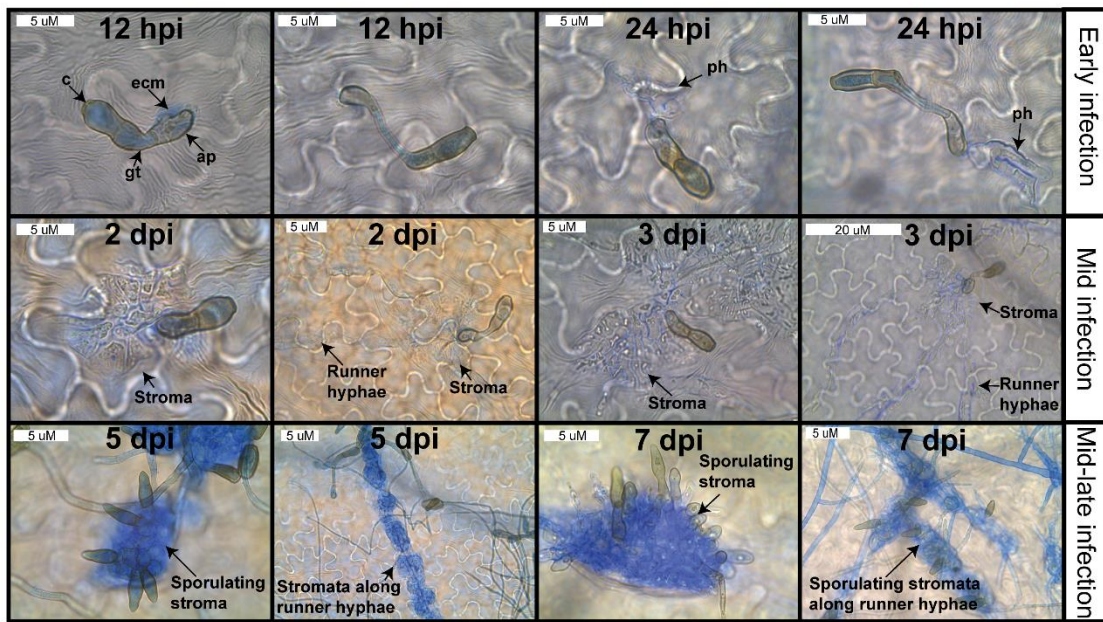

**B.**

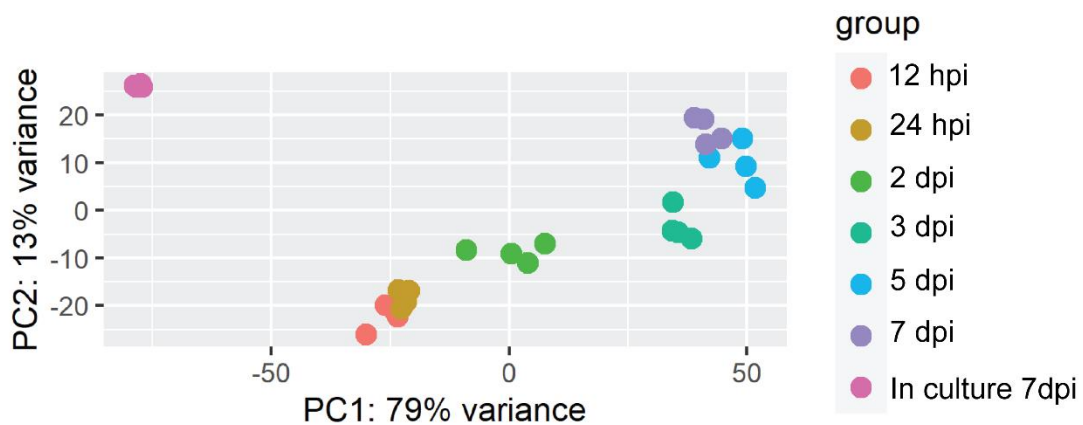

140

141 **Fig. 1** Microscopic and transcriptomic profile of *Venturia inaequalis* during infection of detached leaves from  
 142 susceptible apple cultivar 'Royal Gala'. **A.** Microscopic evaluation of *V. inaequalis* during colonization of apple  
 143 leaves. Infection structures observed by bright-field microscopy were stained with aniline blue. Infected leaves  
 144 are representative of material used in the RNA-seq transcriptome sequencing experiment. c, conidium; gt, germ  
 145 tube; ap, appressorium; ecm: extracellular matrix; ph: primary hyphae. **B.** Principal component analysis (PCA) of  
 146 RNA-seq data from *V. inaequalis* during colonization of apple leaves and in culture on the surface of cellophane  
 147 membranes overlaying potato dextrose agar. Four biological replicates were used for each *in planta* time point  
 148 and the in culture growth condition. hpi: hours post-inoculation; dpi: days post-inoculation.



149

## 150 **Genes of *V. inaequalis* are expressed in temporal waves during infection of apple leaves**

151 We set out to identify which genes of *V. inaequalis* are up-regulated during host colonization,  
152 when compared to growth in culture. For this purpose, we updated the current gene catalogue for  
153 isolate MNH120 [20] to increase the total number of annotated genes, including those that encode  
154 ECs, which are notoriously difficult to predict in fungi (**Additional file 2: Fig. S1**). Here, our approach  
155 was to predict as many genes as possible and, as a consequence, it is expected that many spurious  
156 genes were included in the annotation. In total, 24,502 genes, excluding splice variants, were  
157 predicted and, of these, 3,563 were up-regulated at one or more *in planta* time points (*p* value of 0.01  
158 and log<sub>2</sub>-fold change of 1.5) (**Additional file 3**).

159 The total set of *in planta* up-regulated genes was used to identify host infection-specific gene  
160 expression clusters, henceforth referred to as temporal waves. Here, all expression data was scaled  
161 across all samples (Z-score) to visualize the gene expression deviation from the overall mean. For  
162 clustering, the parameters were set to specifically identify the minimum number of gene clusters for  
163 which a distinct gene expression profile could be observed (**Fig. 2A**). In total, five distinct host  
164 infection-specific gene expression waves (**Fig. 2A**), representing three separate infection stages (**Fig.**  
165 **2B**), were identified (**Additional file 4: Fig. S2**). Waves 1 (274 genes) and 2 (550 genes) represented  
166 early infection (**Figs. 2A and 2B**). Genes of these two waves demonstrated their highest level of  
167 expression at 12 hpi, with expression largely plateauing (wave 1) or trending downwards (wave 2)  
168 throughout the remaining infection time points (**Figs. 2A and 2B**). Wave 3 (453 genes) represented  
169 mid infection. This wave contained genes that had a peak level of expression at 2 dpi (**Figs. 2A and**  
170 **2B**). Finally, waves 4 (959 genes) and 5 (1,318 genes) represented mid-late infection (**Figs. 2A and 2B**).  
171 Genes of wave 4 displayed their lowest level of expression at 12 and 24 hpi, with expression strongly  
172 increasing through 2 and 3 dpi, peaking at 5 dpi (**Figs. 2A and 2B**). A similar profile was also observed  
173 for genes of wave 5, but with expression strongly increasing from 3 dpi and peaking at 7 dpi (**Figs. 2A**  
174 **and 2B**).



175           To determine which biological processes are overrepresented in the five host infection-  
176 specific gene expression waves, gene ontology (GO) (**Fig. 2B, Additional file 5: Fig. S3, Additional file**  
177 **6**) and protein family (Pfam) enrichment analyses (**Additional file 7**) were performed. Early infection  
178 (waves 1 and 2) was characterized by GO terms associated with high metabolic activity and responses  
179 to oxidative stress. In contrast, mid infection (wave 3) was characterized by GO terms associated with  
180 transmembrane transport, while mid-late infection (waves 4 and 5) was mostly characterized by GO  
181 terms associated with carbohydrate metabolism (**Fig. 2B**).

182

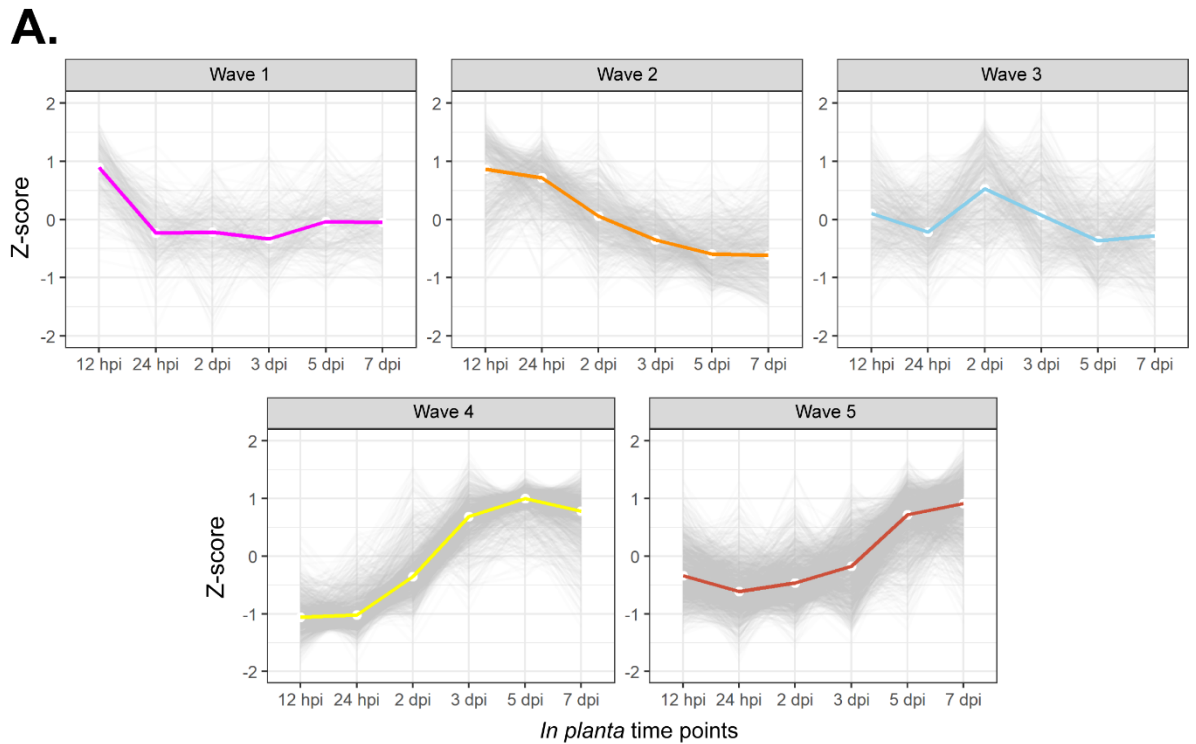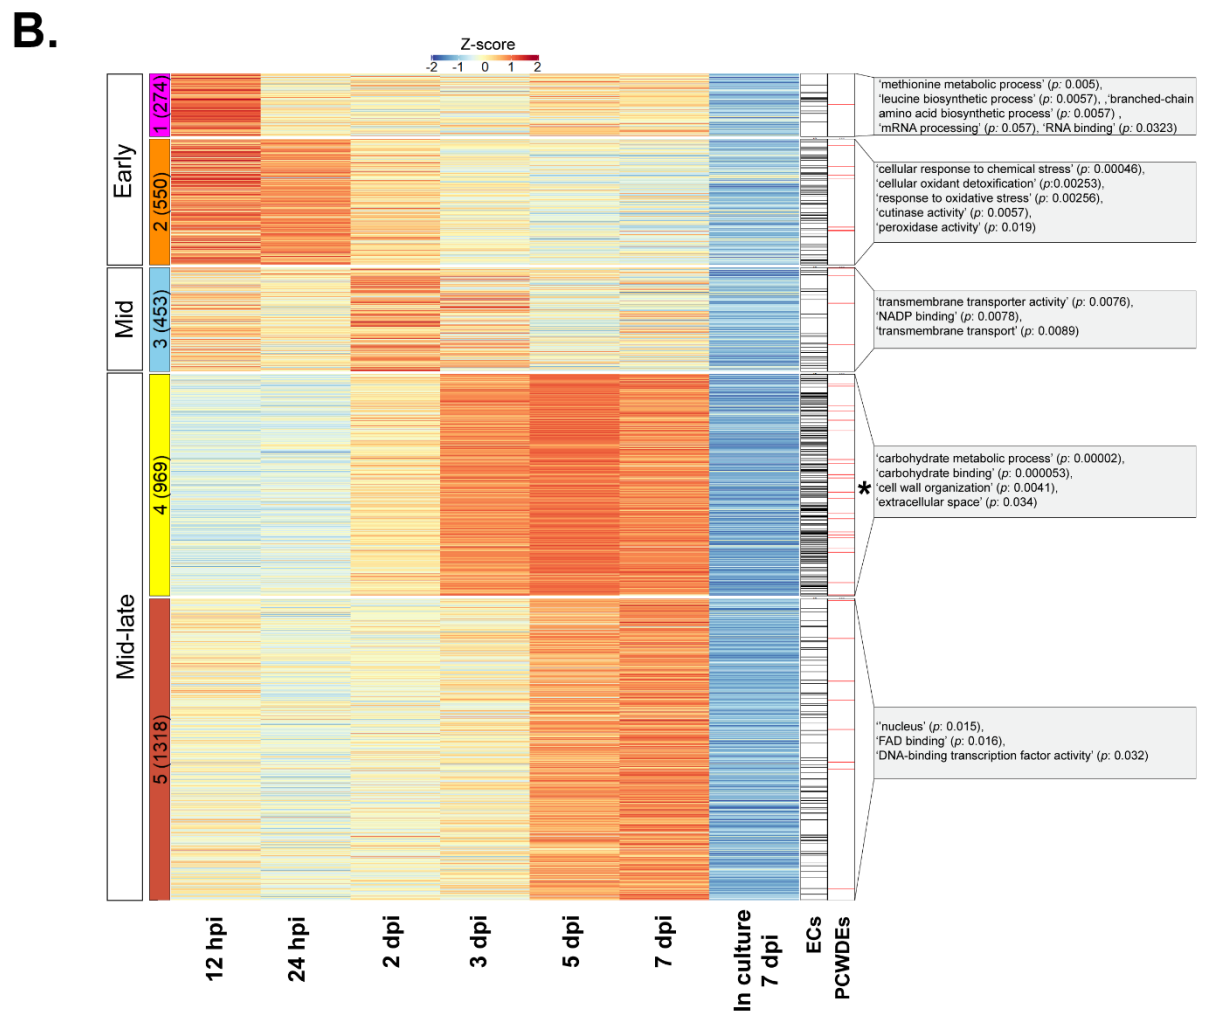

184 **Fig. 2** Genes of *Venturia inaequalis* up-regulated during infection of susceptible apple cultivar ‘Royal Gala’,  
185 relative to growth in culture, belong to one of five distinct expression waves. **A.** Expression profile of the five  
186 distinct expression waves at 12 and 24 hours post-inoculation (hpi), as well as 2, 3, 5 and 7 days post-inoculation  
187 (dpi), relative to growth in culture (7 dpi). **B.** Heatmap of all *V. inaequalis* genes up-regulated *in planta* when  
188 compared with growth in culture. Gene expression data are scaled rlog-normalized counts across all samples (Z-  
189 score), averaged from four biological replicates. Genes up-regulated *in planta* were clustered using hclust  
190 method Ward.D2 and Euclidian distance. Coloured block labels on the left indicate gene expression waves.  
191 Numbers in brackets indicate number of genes per wave. Black asterisk indicates the wave significantly enriched  
192 for ECs ( $p$  value:  $3.644e-14$ ). Grey boxes indicate enriched gene ontology (GO) terms per wave highlighted in the  
193 main text. ECs: effector candidates; PCWDEs: plant cell wall-degrading enzymes;  $p$ : value.

194

### 195 **Plant cell wall-degrading enzyme (PCWDE)- and transporter-encoding genes of *V. inaequalis* are up-** 196 **regulated during colonization of the subcuticular environment**

197 To understand the nutritional requirements of *V. inaequalis* during colonization of the  
198 subcuticular environment, we investigated the expression profile of genes that putatively encode  
199 PCWDEs and transporters during the five host infection-specific waves (**Figs. 3 and 4**). Within the early  
200 infection wave 1, only four genes encoding PCWDEs, mostly of the auxiliary activity (AA) enzyme class,  
201 that are thought to aid the activity of subsequent classes of PCWDEs, were expressed. Within wave 2,  
202 an increase in the overall number of genes encoding PCWDEs, mostly of the AA and carbohydrate  
203 esterase (CE) classes (e.g. CE5 cutinases), was observed. Within wave 3 (mid infection), only six  
204 PCWDE-encoding genes were expressed, representing a mixture of AA and CE enzymes. Later, within  
205 wave 4, a striking increase in the number of genes encoding PCWDEs, mostly of the glycoside  
206 hydrolase (GH) class (e.g. GH28s), was observed. Finally, during wave 5 (mid-late infection), genes  
207 encoding GH and AA enzymes predominated.

208 The expression profile of genes encoding sugar and nitrogen transporters also differed during  
209 early and mid-late infection. During early infection (waves 1 and 2), only two genes encoding sugar

210 transporters, together with seven genes encoding nitrogen-associated transporters, were up-  
211 regulated. Most of the up-regulated genes encoding nitrogen transporters belonged to the  
212 oligopeptide (OPT) transporter family. Many OPT transporter-encoding genes were found to be co-  
213 expressed highly with aspartyl protease-encoding genes ( $R > 0.8$ ). During mid infection (wave 3), only  
214 two genes encoding sugar transporters were expressed and genes encoding nitrogen transporters  
215 started increasing expression. During mid-late infection (waves 4 and 5), there was also a striking  
216 increase in the expression of genes encoding sugar and nitrogen transporters (**Fig. 4**).

217           Taken together, the differences observed between the expression of genes encoding PCWDEs  
218 and transporters across the different waves likely reflect the differences in the nutritional  
219 requirements by *V. inaequalis* during early and mid-late subcuticular host colonization.

220

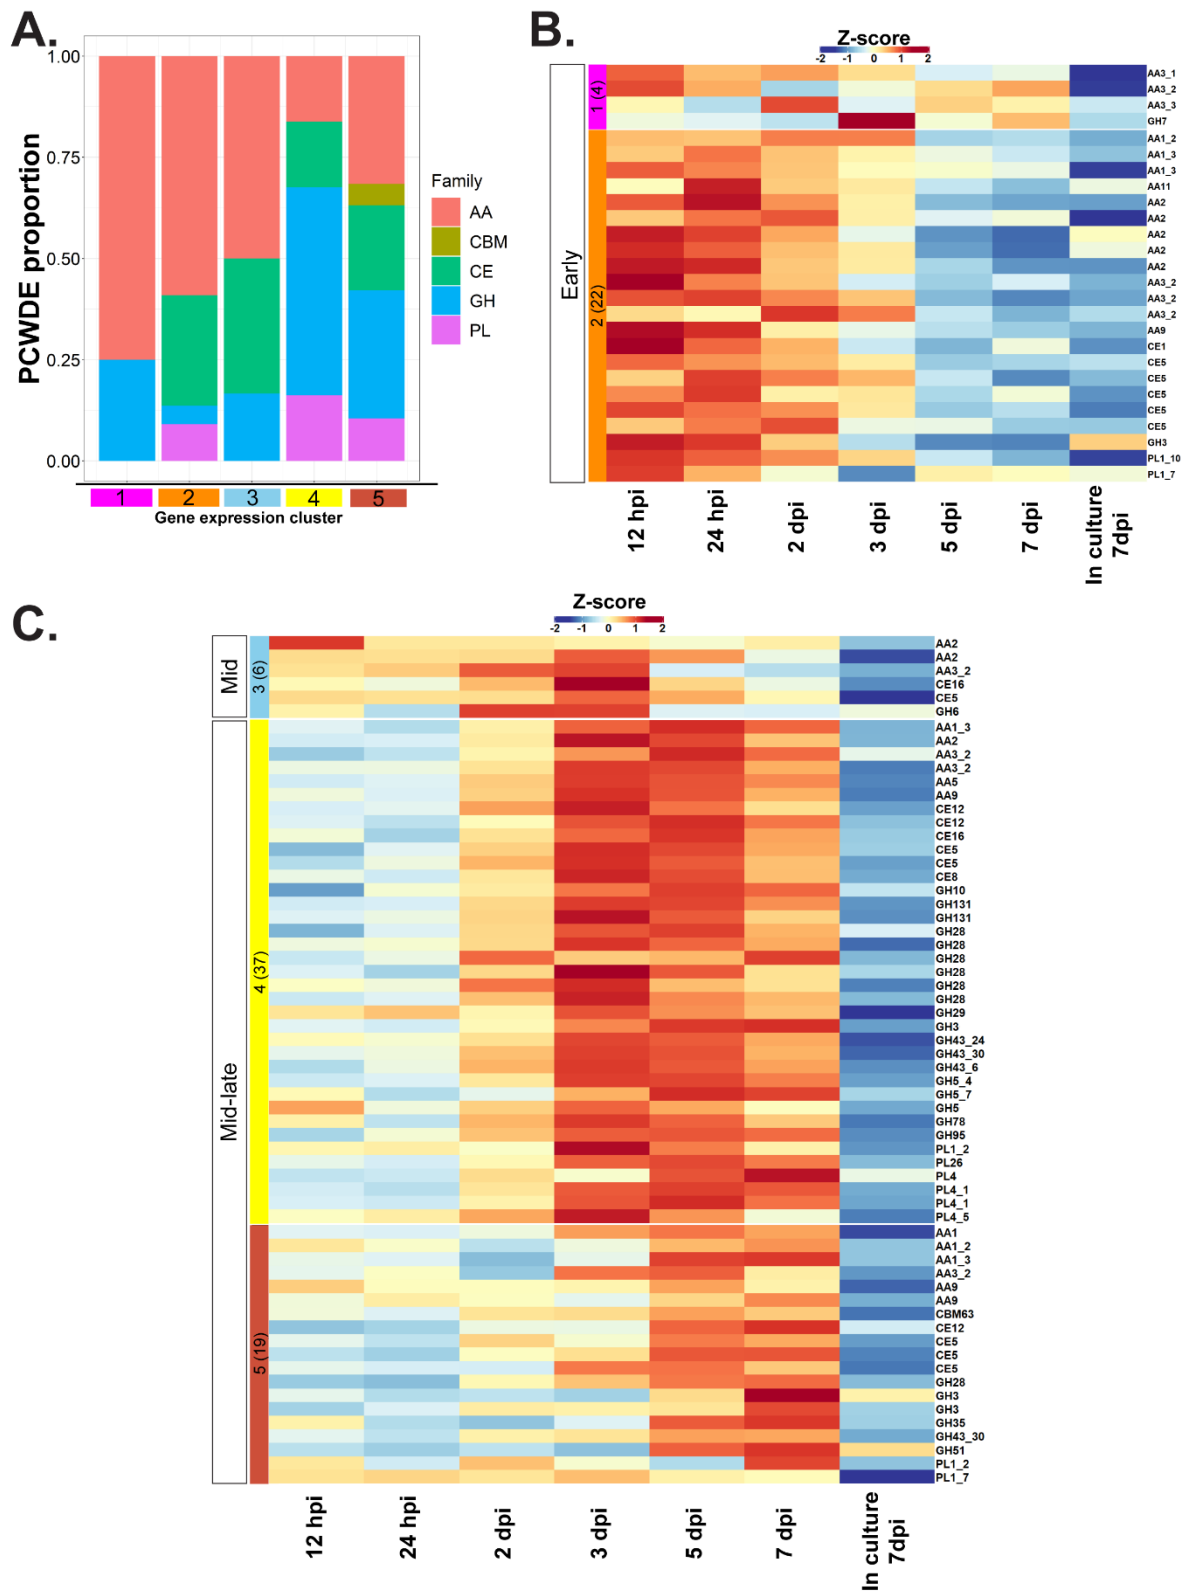

221

222 **Fig. 3** Plant cell wall-degrading enzyme (PCWDE)-encoding genes of *V. inaequalis* up-regulated during infection

223 of susceptible apple cultivar 'Royal Gala', relative to growth in culture. **A.** Proportion of *in planta* up-regulated

224 PCWDE-encoding genes in each host infection expression wave. **B.** Heatmap of PCWDE-encoding genes up-

225 regulated *in planta* during early infection waves 1 and 2. **C.** Heatmap of PCWDE-encoding genes up-regulated  
 226 during mid infection (wave 3) and mid-late infection (waves 4 and 5). Labels on the right indicate expression  
 227 profiles corresponding to genes encoding carbohydrate-active enzymes (CAZymes). Block labels on the left  
 228 indicate gene expression wave. Gene expression data are scaled rlog-normalized counts across all samples (Z-  
 229 score), averaged from four biological replicates. hpi: hours post-inoculation; dpi: days post-inoculation. AA:  
 230 auxiliary activity; GH: glycoside hydrolase; CE: carbohydrate esterase; PL: polysaccharide lyases; CBM:  
 231 carbohydrate-binding module. Numbers in brackets indicate number of genes per wave.  
 232

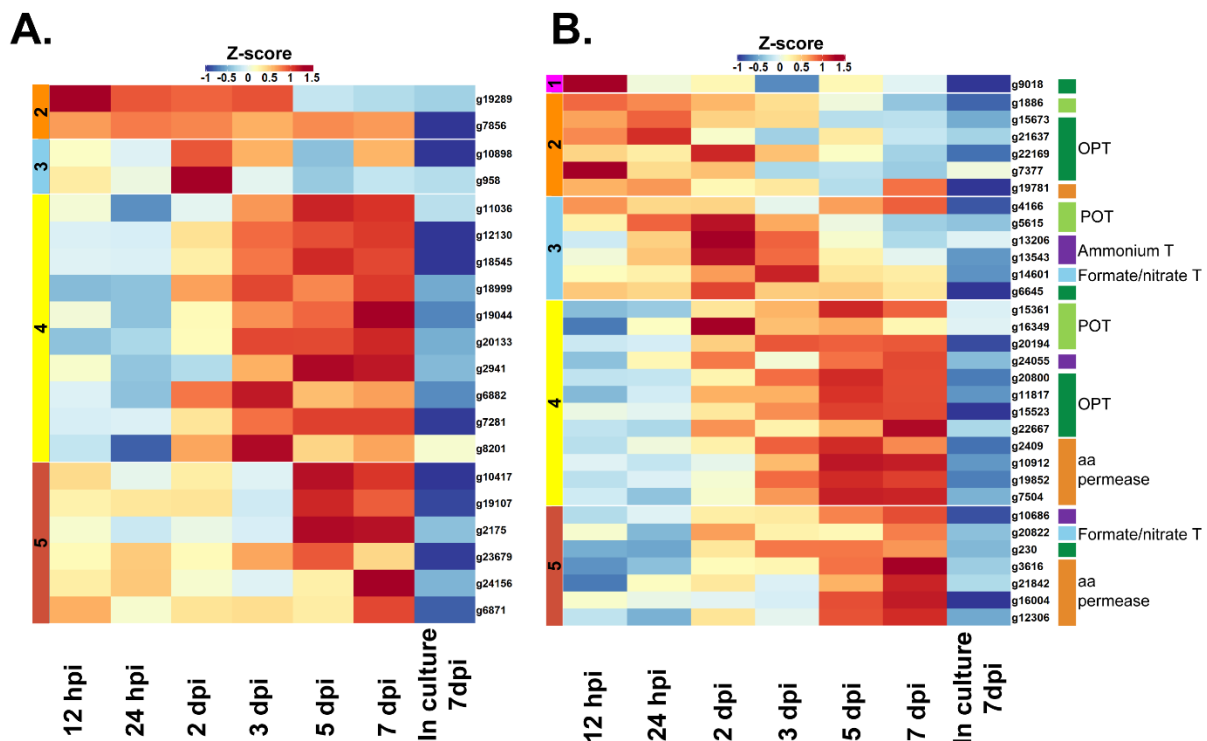

233

234 **Fig. 4** Sugar- (A.) and nitrogen-associated transporter (B.) genes of *Venturia inaequalis* up-regulated during  
 235 infection of susceptible apple cultivar ‘Royal Gala’, relative to growth in culture. Gene expression data are scaled  
 236 rlog-normalized counts across all samples (Z-score), averaged from four biological replicates. hpi: hours post-  
 237 inoculation; dpi: days post-inoculation. Sugar transporters in A. (PF0083), nitrogen associated transporters in B.  
 238 OPT: oligopeptide transporter (PF03169); POT: proton-dependent oligopeptide transporter (PF00854);  
 239 Ammonium T: ammonium transporter (PF00909); aa permease: amino acid permease (PF13620);  
 240 Formate/nitrate T: formate/nitrate transporters (PF01226).

241

242 **Genes encoding components of the predicted *V. inaequalis* effector repertoire are predominantly**  
243 **expressed in the early and mid-late waves**

244 To determine whether the predicted *V. inaequalis* effector repertoire is expressed in temporal  
245 waves during host colonization, the expression of genes encoding putative effectors was examined,  
246 including genes responsible for the biosynthesis of secondary metabolites and genes encoding  
247 proteinaceous ECs. A total of 26 secondary metabolite gene clusters were predicted using antiSMASH  
248 v6.0.1; however, only seven were up-regulated during host-colonization. Of these, two were non-  
249 ribosomal peptide synthetase-like (NRPS-like) clusters, two were type I polyketide synthase (T1PKS)  
250 clusters, two were indole clusters, and one was a siderophore cluster (**Additional file 8: Fig. S4**). All of  
251 the up-regulated secondary metabolite genes, except the lowly expressed T1PKS1 core biosynthetic  
252 gene *g15330*, were expressed during the mid-late infection waves (waves 4 and 5) (**Additional file 8:**  
253 **Fig. S4**).

254 Ribosomally-synthesized and post-translationally modified peptide (RiPP) gene clusters  
255 cannot be predicted using antiSMASH. Therefore, RiPP biosynthetic clusters present in the *V.*  
256 *inaequalis* genome were manually identified by searching for genes that encode a protein with a  
257 DUF3328 (or DUF3328-like) domain, as this domain is known to be associated with RiPP biosynthesis  
258 [37]. In total, nine dikaritin RiPP clusters were identified, with each cluster containing one or more  
259 DUF3328 protein-encoding genes as well as a RiPP precursor gene (**Additional file 9: Fig S5**). Three of  
260 the dikaritin RiPP clusters were made up of genes that were highly expressed and up-regulated during  
261 host-colonization. Of these, all were expressed during the mid-late infection waves (4 and 5). The most  
262 highly expressed dikaritin precursor gene (*g7830*, from the dikaritin-2 cluster) was expressed during  
263 wave 4. This gene corresponds to the previously identified gene, *cellophane-induced (Cin) 3*, which  
264 was formerly considered to be a repeat-containing EC protein [14, 20].

265



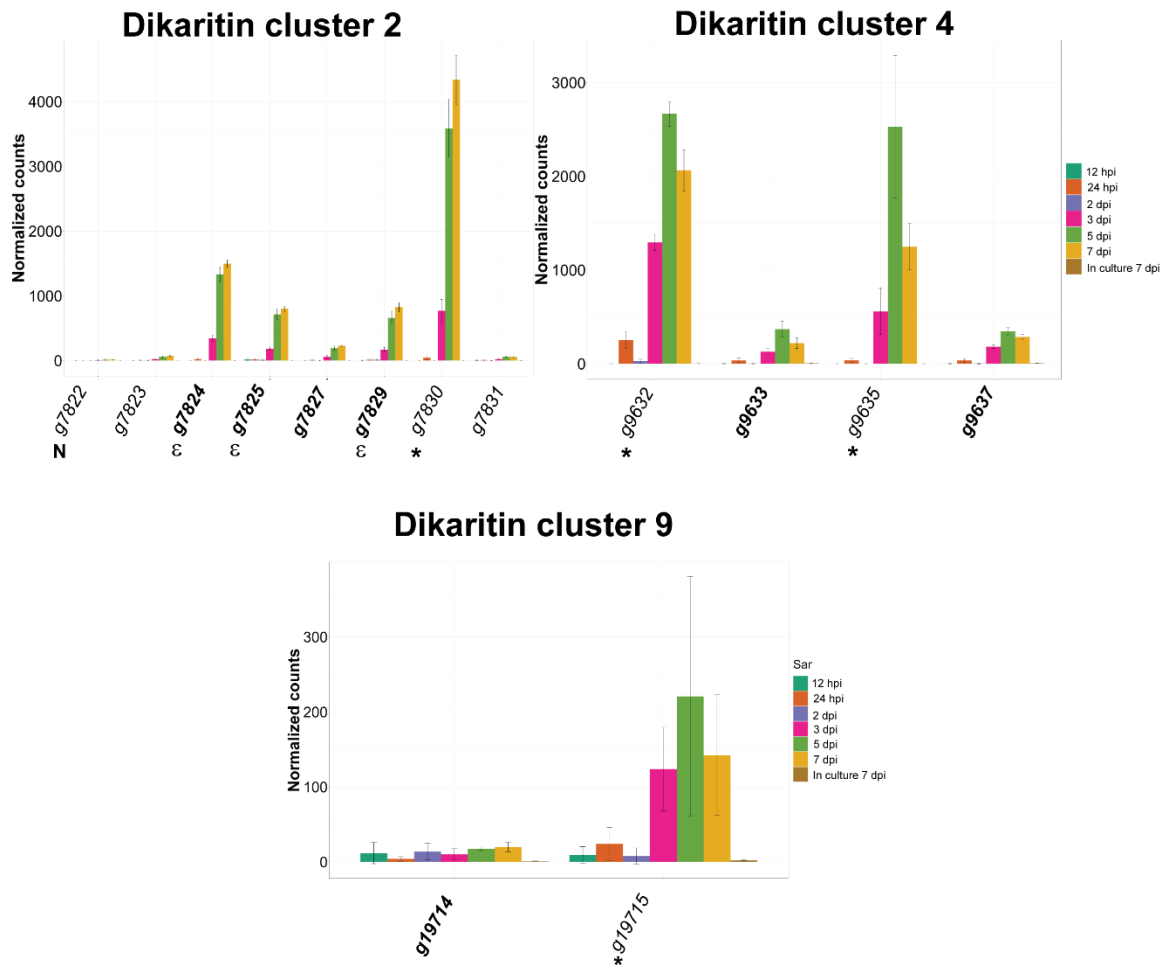

266

267 **Fig. 5** Expression of ribosomally-synthesized and post-translationally modified peptide (RiPP) dikaritin gene  
 268 clusters from *Venturia inaequalis* that are up-regulated during colonization of susceptible apple cultivar ‘Royal  
 269 Gala’, relative to growth in culture. Gene expression data are DESeq2-normalized counts, averaged from four  
 270 biological replicates per infection time point *in planta*, with error bars representing standard deviation (hpi,  
 271 hours post-inoculation; dpi, days post-inoculation) and during growth in culture. Genes marked with bold  
 272 characters encode putative DUF3382 proteins. Genes marked as ε putatively encode a protein with a DUF3382  
 273 domain or were annotated as a major-facilitator superfamily protein. Genes marked with \* putatively encode a  
 274 dikaritin precursor peptide. The gene marked with N encodes a protein with no characterized functional domain.

275

276 Proteinaceous ECs were investigated including genes that encode small secreted proteins of  
 277 ≤400 amino acid residues or larger secreted proteins with an effector prediction by EffectorP v3.0. In  
 278 total, 1,369 genes encoding putative proteinaceous ECs were identified (**Additional file 10: Fig. S6**).

279 Amino acid similarities among these ECs were investigated using BLASTp, and the ECs grouped into  
280 families using spectral clustering. Based on this analysis, 759 of the proteinaceous EC were grouped  
281 into 118 families ranging in size from 2 to 75 members. Of these, 32 families were found to be  
282 expanded with five or more members. Only 610 of the proteinaceous ECs were singletons that did not  
283 belong to any family (**Additional file 11**). Of the genes encoding proteinaceous ECs, 686 were both up-  
284 regulated *in planta* and expressed during one of the early or mid-late infection waves. More  
285 specifically, early infection (waves 1 and 2) contained transcripts from 139 EC genes, while the mid-  
286 late infection stage (waves 4 and 5) contained transcripts from 485 EC genes (**Fig. 6**). The early  
287 infection waves were mostly composed of singletons, while the mid-late infection waves were mostly  
288 composed of expanded families (**Fig. 6**).

289 Most of the EC genes expressed during early infection (waves 1 and 2) encoded proteins that  
290 lacked predicted functional domains. However, two genes from wave 2 encoded proteins with an  
291 Egh16-like virulence factor domain and had amino acid sequence similarity to the appressorium-  
292 specific Gas1 effector from the rice blast fungus *Magnaporthe oryzae* [38], hereafter named the Gas1-  
293 like family. Three of four identified expanded gene families expressed during the early infection waves  
294 also encoded proteins with predicted functional domains. These were family 8 with a stress-up  
295 regulated Nod19 domain (PF07712), hereafter named the Nod19 family (39 members), family 13 with  
296 a hydrophobic surface-binding protein A (HsbA) domain (PF12296), hereafter named the HsbA family  
297 (15 members), and family 37 with a common fold in several fungal extracellular membrane proteins  
298 (CFEM) domain (PF05730) [39], hereafter named the CFEM family (16 members).

299 The Nod19 family is the third most expanded EC family in *V. inaequalis*, and most Nod19 family  
300 members were encoded by genes that were both up-regulated *in planta* and expressed during early  
301 host colonization (waves 1 and 2) (**Fig. 6 and Additional file 12: Fig. S7A**). Alignment of all members  
302 from this family with Nod19 domain-containing proteins from *Medicago truncatula* (barrel medic) and  
303 the potato late blight oomycete *Phytophthora infestans* revealed that they all contained the conserved  
304 motif H-X-H-X-GG-X18/20-Y (**Additional file 12: Fig. S7B**). The HsbA and CFEM families are mostly

305 expressed during early host-colonization (**Fig. 6**). However, each of these families had genes with  
306 contrasting expression profiles, with most members expressed during early infection (waves 1 and 2)  
307 and a few members expressed during mid-late infection (waves 4 and 5) (**Additional file 13: Fig. S8**).  
308 Interestingly, the *HsbA* genes expressed during early host colonization appeared to be co-expressed  
309 with cutinases ( $R > 0.8$ ).

310 Another family with contrasting expression among members during host colonization was the  
311 *Cin 1* family (**Additional file 13: Fig. S8**) [40]. This family contains the *Cin1* gene (*g8385*), which encodes  
312 a cysteine-rich protein with eight repeats, and two *Cin1-like* genes (*Cin1-like 1: g10529*, *Cin1-like 2:*  
313 *g13013*), which encode smaller proteins with only one repeat. The *Cin1* family has no homology to  
314 known proteins and is specific to the *Venturia* genus (**Additional file 14: Fig. S9**). *Cin1* was expressed  
315 during mid-late infection (wave 4), and it was the most highly expressed gene during mid-late host  
316 colonization. In contrast, the *Cin1-like* genes were expressed during early infection (wave 2)  
317 (**Additional file 14: Fig. S9**).

318

A.

Early EC waves (n=139)  
Singletons (64) + ECs from a family (75)

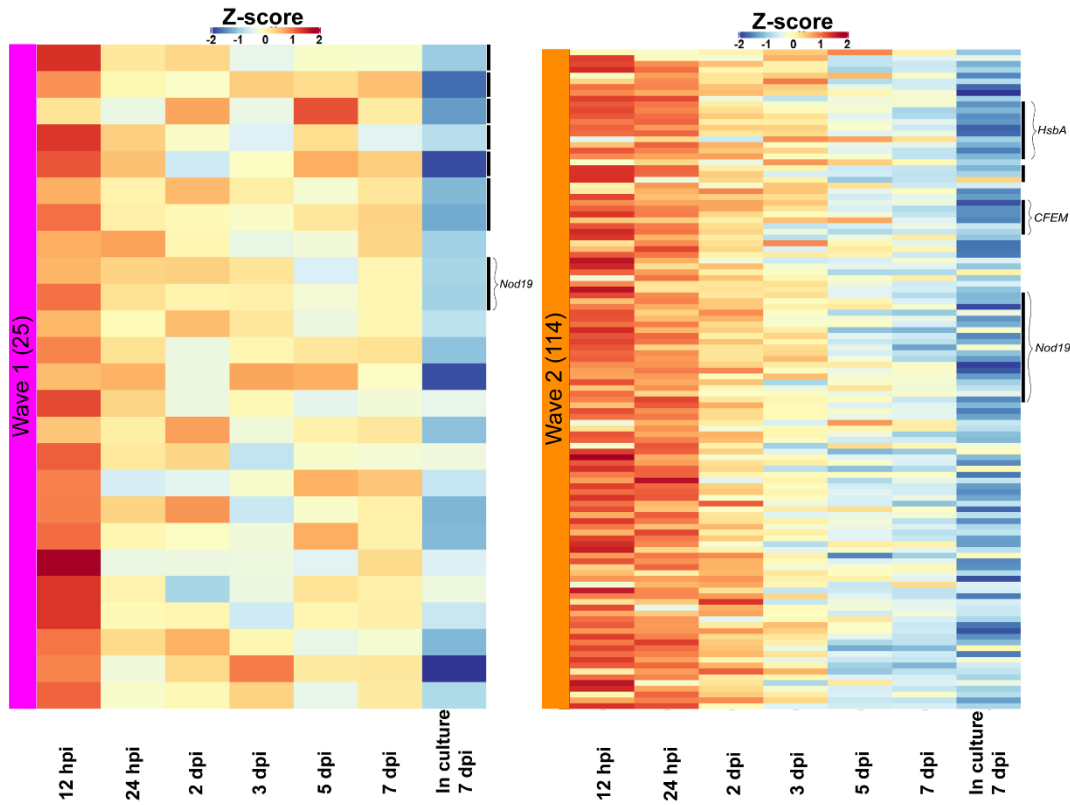

B.

Mid-late EC waves (n=485)  
Singletons (93) + ECs from a family (392)

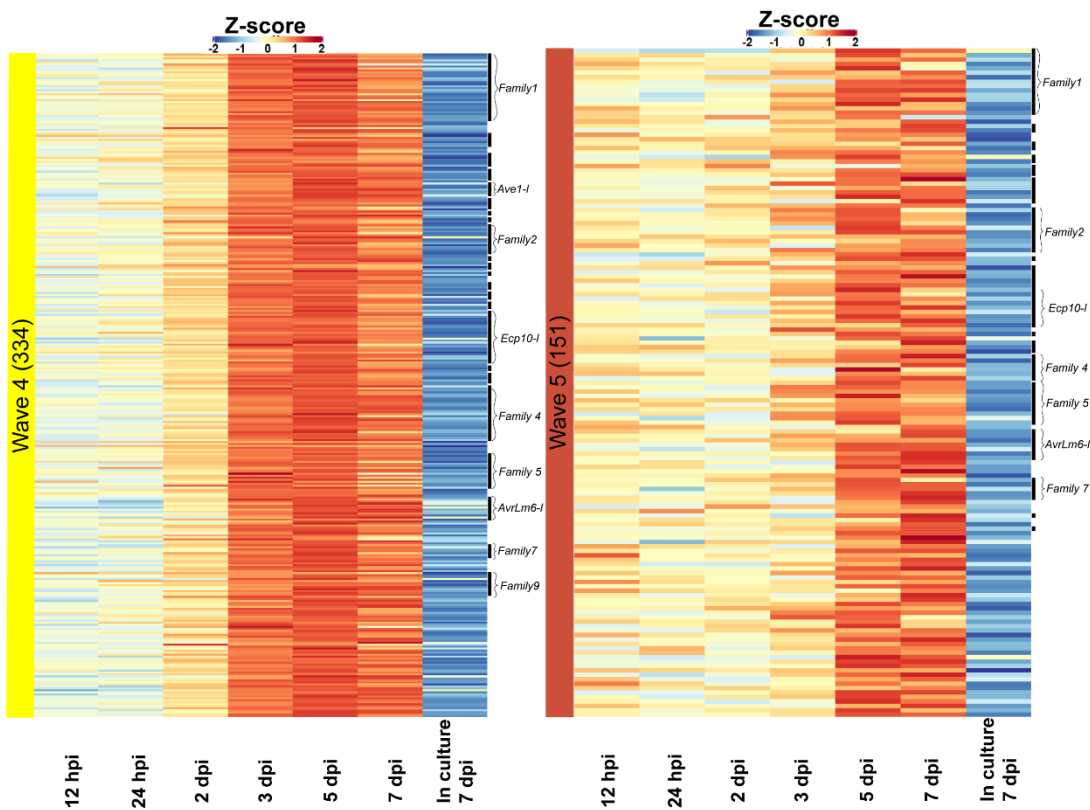

320 **Fig. 6** Genes encoding proteinaceous effector candidates (ECs) of *Venturia inaequalis* are expressed in waves  
321 during colonization of susceptible apple cultivar 'Royal Gala'. Early infection (**A.**) waves 1 and 2 are composed of  
322 139 EC-encoding genes, and the mid-late infection (**B.**) waves 4 and 5 are composed of 485 EC-encoding genes.  
323 Black annotations on the right indicate that the proteins encoded by these genes belong to an expanded EC  
324 family ( $\geq 5$  members), with brackets highlighting large families and families with amino acid sequence similarity  
325 to avirulence (Avr) effector proteins from other plant-pathogenic fungi. hpi: hours post-inoculation; dpi: days  
326 post-inoculation.

327

328 The mid-late infection waves (waves 4 and 5) possessed the largest number of transcripts from  
329 genes encoding proteinaceous ECs, with 485 genes expressed from 2 to 7 dpi. Indeed, wave 4 was  
330 enriched in ECs ( $p$  value:  $3.644e-14$ ). Notably, most expanded families, including those with amino  
331 acid similarity to effectors or Avr effectors from other plant-pathogenic fungi, were encoded by genes  
332 that were expressed during waves 4 and 5 (**Fig. 6, Additional file 15: Table S2**). For example, the  
333 *AvrLm6-like* family [16] had 21 up-regulated genes *in planta*, with most expressed during waves 4 and  
334 5 (**Fig. 7A**). Likewise, the *Ave1-like* family [20] had eight genes up-regulated *in planta*, with most  
335 expressed during wave 4 (**Fig. 7A**). One of the genes in this family, *g18550*, was the second most highly  
336 expressed EC gene during mid infection, and encoded a protein with the highest amino acid similarity  
337 to Ave1 (39.3% pair wise identity). Another example was the *Ecp10-like* family, which encoded  
338 proteins with amino acid sequence similarity to Ecp10-1, an Avr EC from the tomato leaf mold fungus  
339 *Cladosporium fulvum*. The *Ecp10-1* family represented the second most expanded family in *V.*  
340 *inaequalis* with 61 members and, of these, 45 were up-regulated during waves 4 and 5 (**Fig. 7A**).  
341 Similarly, a family of six proteins with amino acid sequence similarity to Ecp39 from *C. fulvum* [41],  
342 hereafter named the Ecp39-like family, were predominantly encoded by genes that were expressed  
343 during waves 4 and 5 (**Fig. 7A**). Finally, an *Ecp6-like* gene (singleton), which encoded a protein with  
344 amino acid similarity to the Ecp6 effector from *C. fulvum*, was very highly expressed during wave 4  
345 (**Fig. 7A**).

346 Interestingly, most expanded EC families encoded by genes expressed during waves 4 and 5  
347 did not have amino acid sequence similarity to other proteins. Of these, family 1 was the most  
348 expanded EC family in *V. inaequalis*. This family was encoded by 75 genes and, of these, 54 were up-  
349 regulated *in planta* (**Fig. 8**). Likewise, family 2 was encoded by 32 genes, and of these, 28 were up-  
350 regulated *in planta* (**Fig. 8**). In most cases, one or a few family members were very highly expressed,  
351 when compared with the other family members, during host colonization (**Fig. 8**).

352

### 353 **Several expanded effector candidate families of *V. inaequalis* have predicted structural similarity to** 354 **Avr effectors from other plant-pathogenic fungi**

355 To gain insights into the putative function of proteinaceous ECs, we predicted their tertiary  
356 structures using AlphaFold2 [42], which has been successfully benchmarked against pathogen  
357 effectors of known tertiary structure [43, 44], and then investigated these structures for similarity to  
358 proteins of characterized tertiary structure (and in some cases, function) using the Dali server [45].  
359 This analysis was specifically performed on the most highly expressed member from each EC family  
360 (which we referred to as the main family member) as well as each singleton, expressed during the host  
361 infection-specific waves. In total, the tertiary structure was confidently predicted for the most highly  
362 expressed member of 75% of EC families (94 families) and 64% of EC singletons (118 singletons)  
363 (**Additional file 16**).

364 We investigated the predicted tertiary structures of EC families from *V. inaequalis* that had  
365 amino acid sequence similarity to known effectors and characterized or candidate Avr effector  
366 proteins from other plant-pathogenic fungi (**Additional file 17: Table S3**) (**Fig. 7**). During early  
367 infection, the most highly expressed *Gas1-like* gene (**Fig. 7A**), as well as the similar *Gas1* effector from  
368 *M. oryzae*, were predicted to encode a protein with an immunoglobulin-like  $\beta$ -sandwich fold. These  
369 structures were similar to chitin-binding lytic polysaccharide monooxygenase (LPMO) proteins (**Fig.**  
370 **7B**). During the mid-late infection waves, the most highly expressed gene of the *Ecp10-like* family (**Fig.**  
371 **7A**) was predicted to encode a protein with a compact  $\beta$ -folded structure, stabilized by three disulfide

372 bonds, that is structurally similar to the antimicrobial PAFB protein from *Penicillium chrysogenum* [46]  
373 (**Fig. 7B**). *C. fulvum* Ecp10-1 on the other hand was predicted to adopt a smaller compact  $\beta$ -folded  
374 structure with only two disulphide bonds (**Fig. 7B**). The most highly expressed *AvrLm6-like* family gene  
375 (**Fig. 7A**), along with *AvrLm6* from *L. maculans*, were predicted to encode a protein with a ferredoxin-  
376 like fold, stabilized by two disulfide bonds, that is structurally similar to the virally encoded *Ustilago*  
377 *maydis* (corn smut pathogen) P6 virus killer toxin  $\alpha$ -subunit (KP6 $\alpha$ ) [47, 48] (**Fig. 7B**), as well as an EC  
378 from the *Septoria tritici* blotch pathogen *Zymoseptoria tritici* [49] (Zt-PK6-1) (**Fig. 8B**). The protein  
379 encoded by the most highly expressed *V. inaequalis Ave1-like* gene (**Fig. 7A**), together with *Ave1*, were  
380 predicted to adopt a double-psi  $\beta$ -barrel fold, stabilized by two conserved disulfide bonds, with high  
381 similarity to expansins (**Fig. 7B**). Both the most highly expressed *Ecp39-like* gene (**Fig. 7A**) and *CfEcp39*  
382 gene from *C. fulvum* were predicted to encode a protein that adopts a crambin-like fold (**Fig. 7B**).  
383 However, no analogous protein structures were found in the RCSB PDB using the predicted tertiary  
384 structure of the *Ecp39-like* protein as query. Finally, the *ViEcp6-like* protein was predicted to adopt a  
385 similar tertiary structure to the previously reported three-domain lysin motif (LysM) structure of *Ecp6*  
386 from *C. fulvum* [50] (**Fig. 7B**).

387



A.

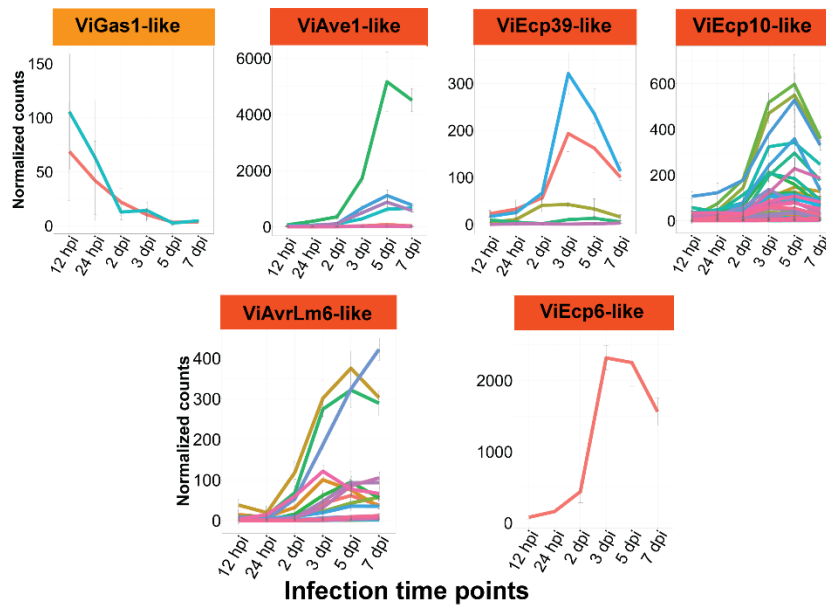

B.

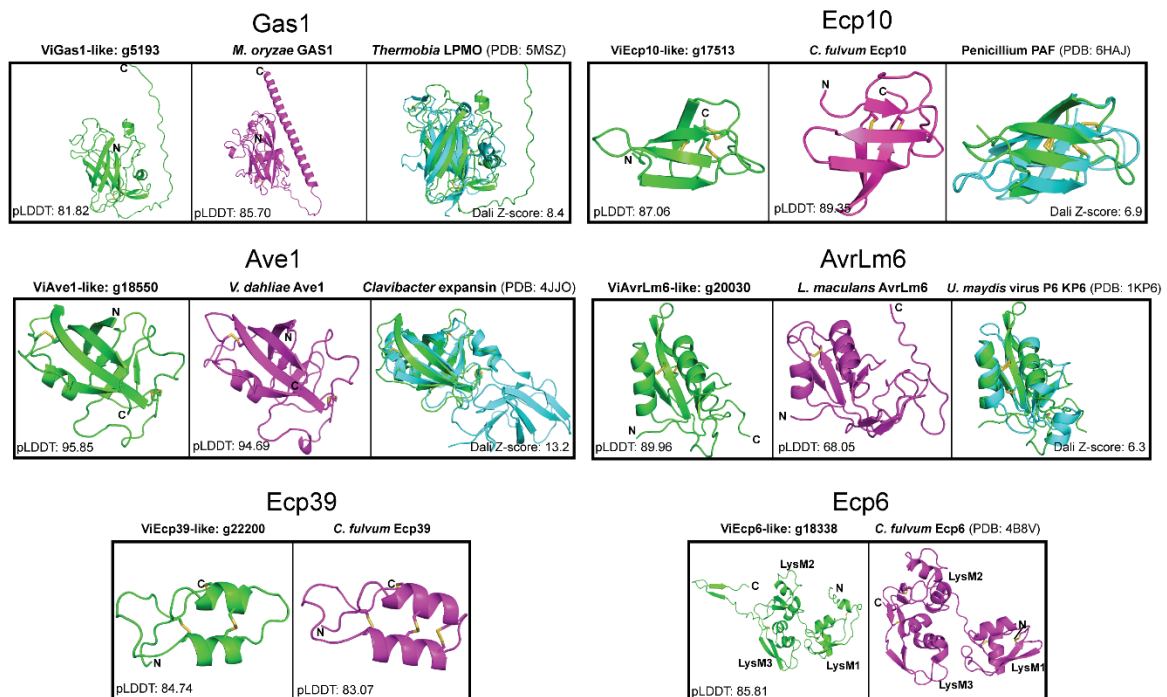

388

389 **Fig. 7** Effector candidate (EC) families and singletons from *Venturia inaequalis* with amino acid sequence  
 390 similarity to effectors and characterized or candidate avirulence (Avr) effector proteins from other plant-  
 391 pathogenic fungi. **A.** Expression data of ECs during host colonization are DESeq2-normalized counts, averaged  
 392 from four biological replicates, with error bars representing standard deviation (hpi: hours post-inoculation; dpi:  
 393 days post-inoculation). Light orange box indicates that the EC family belongs to the early expression waves (wave  
 394 1 or 2) and dark orange box indicates that the EC family belongs to the mid-late expression waves (wave 4 or 5).

395 **B.** Protein tertiary structures of candidate virulence and avirulence (Avr) effector proteins predicted by  
396 AlphaFold2, except Ecp6 from *Cladosporium fulvum* (RCSB PDB id: 4B8V). Disulfide bonds coloured in yellow. *V.*  
397 *dahliae* is *Verticillium dahliae*; *U. maydis* is *Ustilago maydis*; *L. maculans* is *Leptosphaeria maculans*. Green  
398 tertiary structures represent the *V. inaequalis* protein; purple structures represent the EC/Avr from the other  
399 fungal pathogen; cyan, represents closest analogous structure in the RCSB PDB database. Amino acid similarity  
400 was identified by reciprocal protein searches based on BLASTp (E-value <0.05). pLDDT: predicted Local Distance  
401 Difference Test score (0–100). A pLDDT score of 70–100 is indicative of medium to high confidence. A Dali Z-  
402 score above 2 indicates ‘significant similarities’ between proteins.

403

404 We investigated the predicted fold of the most highly expressed member of the *V. inaequalis*  
405 EC families and singletons that were novel and did not share obvious amino acid similarity with other  
406 ECs and/or Avr effectors. Strikingly, many EC families were predicted to be structurally similar to one  
407 or more ECs or Avr effector proteins with solved tertiary structures from other plant-pathogenic fungi  
408 (**Fig. 8, Additional file 17: Table S3, Additional file 18: Fig. S9**). Of the 94 EC families up-regulated *in*  
409 *planta*, 71 could be assigned a structure with confidence and of those, 12 families were structurally  
410 analogous to ECs and/or Avr effectors (**Additional file 17: Table S3**). Remarkably, many of these  
411 families were among the most expanded families in *V. inaequalis*, while only three singletons had  
412 structural similarity to other ECs and/or Avr effectors (**Table 1**).

413 The main member of the most expanded EC family in *V. inaequalis*, family 1, was confidently  
414 predicted to adopt a six-stranded  $\beta$ -sandwich fold with structural similarity to seven *Magnaporthe* Avr  
415 and ToxB-like (MAX) effectors. The identified MAX effectors were the new MAX effector 6R5J [51] and  
416 the Avr effectors AvrPiz-t [52], Avr-Pia [53, 54], Avr-Pib [55], Arv1-CO39 [53] and Avr-Pik [56] from the  
417 rice blast fungus *M. oryzae*, as well as the ToxB virulence effector from *Pyrenophora tritici-repentis*  
418 [57], the fungal pathogen responsible for tan spot of wheat (**Additional file 17: Table S3**). An amino  
419 acid sequence alignment constructed from all family 1 protein members from *V. inaequalis*, as well as  
420 the identified MAX effectors from *M. oryzae*, revealed that these proteins lacked significant amino

421 acid sequence similarity, with a maximum pairwise identity of only 13.9% observed between *g13386*  
422 and Avr1-CO39 (**Additional file 19**). However, these sequence-diverse proteins did share the  
423 characteristic conserved disulphide bond between  $\beta$ 1 and  $\beta$ 5 that has previously been reported for  
424 MAX effectors [53] (**Fig. 8A**).

425 Two additional expanded families, family 7 with 21 members and family 28 with 6 members,  
426 as well as a small family with three members (family 38) and a singleton, shared a common  $\beta$ -sandwich  
427 fold with structural similarity to the virulence effector ToxA from *P. tritici-repentis* [58], the Avr  
428 effectors Avr2/Six3 from the wilt fungus *Fusarium oxysporum* [59], and AvrL567-A from the flax rust  
429 fungus *Melampsora lini* [60] (**Fig. 8A, Additional file 17: Table S3, Additional file 18: Fig. S9**). Notably,  
430 despite sharing an overall  $\beta$ -sandwich fold with similar topology, these proteins were very diverse at  
431 the amino acid level, with a maximum amino acid identity of 12.7% (**Additional file 19**). All of the ToxA-  
432 like families had a different number of  $\beta$ -sheets: family 7 with 10  $\beta$ -sheets, family 28 with nine  $\beta$ -  
433 sheets, family 38 with eight  $\beta$ -sheets and the singleton with nine  $\beta$ -sheets (**Additional file 18: Fig. S9**).

434 Another two families, family 15 with 12 members and family 47 with two members, were  
435 found to have structural similarity to AvrLm4-7 and AvrLm5-9 from *L. maculans*, as well as Ecp11-1  
436 from *C. fulvum* [61, 62] (**Fig. 8A, Additional file 17: Table S3, Additional file 18: Fig. S9**), which belong  
437 to the *Leptosphaeria* AvIRulence-Suppressing (LARS) structural superfamily [62]. AvrLm4-7 has four  
438 stranded  $\beta$ -sheets [61]; however, the *V. inaequalis* LARS-like effectors had the same predicted  
439 topology but with a variable number of  $\beta$ -sheets. Specifically, members of family 15 had five  $\beta$ -sheets,  
440 while members of family 47 had three  $\beta$ -sheets. The identified *V. inaequalis* LARS-like proteins share  
441 an amino acid identity of only 7.8–16.9% with AvrLm4-7, AvrLm5-9 and Ecp11-1 (**Additional file 19**).  
442 Interestingly, these structures are stabilized by a different number of disulfide bonds, and they lack  
443 both the conserved disulfide bridge between the  $\alpha$ -helix and  $\beta$ -strand, as well as the conserved  
444 WR(F/L/V)(R/K) motif, previously reported for the LARS effectors (Lazar et al., 2020).

445 Family 49, with 3 members, was predicted to adopt a two-domain fold similar to the Avr1/Six4  
446 and Avr3/Six1 Avr effectors from *F. oxysporum* (**Fig. 8A, Additional file 17: Table S3**), which are the

447 founding members of the *Fol* dual-domain (FOLD)-family effector family recently identified in *F.*  
448 *oxysporum* [43]. The *V. inaequalis* FOLD-like family representative shared 17.6% amino acid identity  
449 with Avr1/Six4 (**Additional file 19**) and, as part of this, the cysteine spacing pattern was conserved.

450 Many expanded families had a ferredoxin-like fold similar to the KP6 protein of the *U. maydis*  
451 P6 virus (**Additional file 20: Fig. S9**) [47, 48] and the Zt-KP6-1 EC from *Z. tritici* [49]. This included the  
452 representative from the AvrLm6-like family (**Fig. 8B**). Additionally, family 2 with 32 members, family 5  
453 with 36 members, family 23 with 5 members, family 26 with 4 members, and two singletons were  
454 predicted to adopt a KP6-like fold (**Additional file 20: Fig. S9**). All KP6-like proteins had two to four  
455 disulphide bridges, two  $\alpha$ -helices and a variable number of  $\beta$ -sheets (**Fig. 8B, Additional file 20: Fig.**  
456 **S9**).

457 Many EC families were made up of proteins that were too small to be included in RCSB PDB  
458 searches using the Dali server or that did not have any significant Dali hit. We investigated the general  
459 structural classification of all proteins with a confidently predicted tertiary structure in this category  
460 and identified three EC families and one EC singleton that were predicted to adopt a knottin-like fold  
461 (**Additional file 16**). The most highly expressed member of family 11 (16 members) (**Fig. 8C**) and a  
462 singleton were predicted to adopt a knottin-like fold with two  $\beta$ -sheets, as well as three disulfide  
463 bonds that form an intramolecular knot (**Additional file 21: Fig. S10**). Additionally, family 12 with 17  
464 members, family 24 with 12 members, and family 35 with 5 members, were predicted to adopt a  
465 knottin-like fold using the SCOPe database [63] (**Additional file 21: Fig. S10**). However, these proteins  
466 were not predicted to have a true intramolecular knot characteristic of knottin proteins based on our  
467 current AlphaFold2 predictions. Instead, these proteins shared a common fold with cysteine-stabilized  
468  $\alpha\beta$  defensins, which are made up of a single  $\alpha$ -helix and three  $\beta$ -strands [64]. In line with previous  
469 reports [65, 66], Avr9 from *C. fulvum* was predicted to adopt a knottin-like fold (**Fig. 8C**).

470 Finally, we investigated which predicted protein SCOPe folds were most frequent in the ECs  
471 expressed during the early (waves 1 and 2) and mid-late infection (waves 4 and 5) stages. During the  
472 early waves, we observed that ECs had a great diversity of predicted folds. The most frequently

473 predicted fold in the early infection wave with a pLDDT score of 70 or higher was the ‘STAT-like’ fold  
474 **(Additional file 22: Fig. S11)**. The ‘STAT-like’ fold was observed for the most highly expressed member  
475 of the HsbA-like family and family 22. In contrast, during the mid-late infection waves, many ECs were  
476 predicted to share similar folds. The most frequently predicted fold observed was the ‘immunoglobulin-  
477 like  $\beta$ -sandwich’ fold, followed by ‘ferredoxin-like’, ‘parallel coiled-coil’ and ‘knottin-like’ folds  
478 **(Additional file 22: Fig. S11)**. The ‘immunoglobulin-like  $\beta$ -sandwich’ fold is made up of the EC families  
479 with a predicted MAX-like or ToxA-like fold, and interestingly, most of the genes encoding these ECs  
480 are expressed during wave 4. Likewise, the ‘ferredoxin-like fold’, which includes the KP6-like ECs, were  
481 also all encoded by genes that are expressed during infection wave 4. In conclusion, genes expressed  
482 during the mid-late infection waves encoded more ECs with similar folds than the early infection  
483 waves, and many of these had structural similarity to Avr effectors or ECs from other plant-pathogenic  
484 fungi.  
485

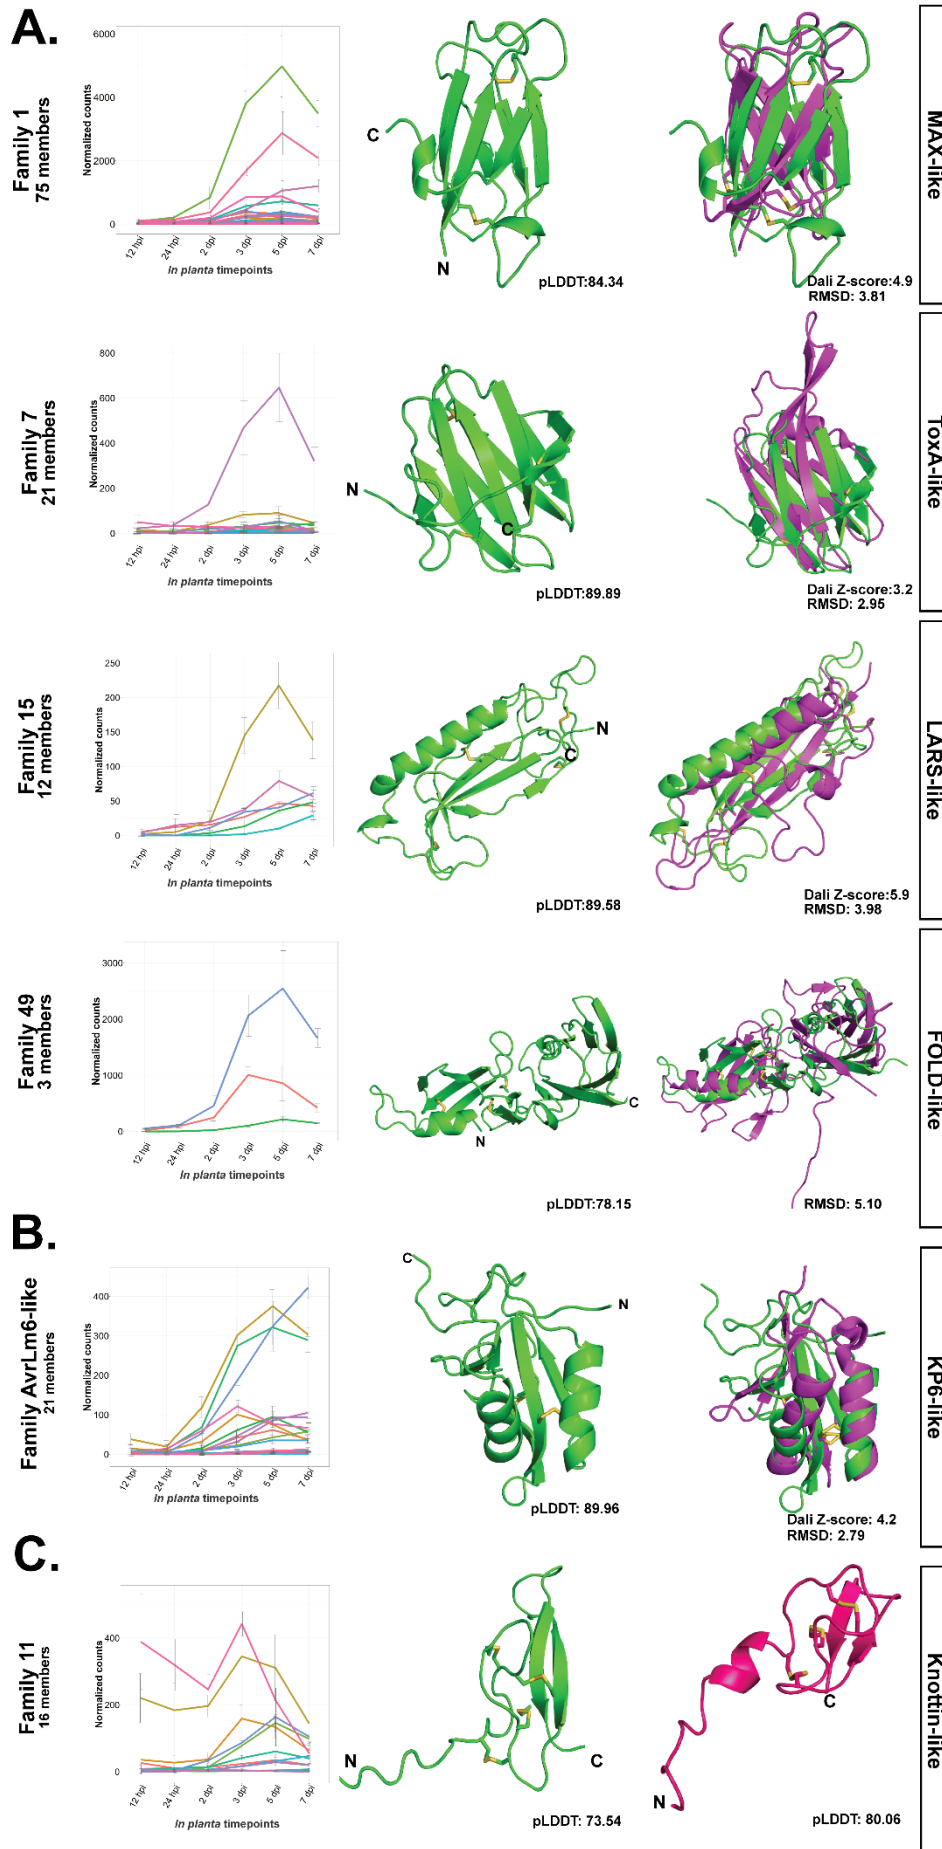

487 **Fig. 8** Predicted tertiary structures of effector candidates (EC) from *Venturia inaequalis*. **A.** Representative EC  
488 family members with structural similarity to known avirulence (Avr) effector proteins from other plant-  
489 pathogenic fungi. MAX-like: representative predicted family 1 protein structure (green; g13386) aligned to an  
490 uncharacterized MAX effector from *Magnaporthe oryzae* (6R5J) (purple). ToxA-like: representative predicted  
491 family 7 (green; g4781) protein structure aligned to ToxA from *Pyrenophora tritici-repentis* (1ZLE) (purple). LARS-  
492 like: representative predicted family 15 (green; g11097) protein structure aligned to AvrLm4-7 from  
493 *Leptosphaeria maculans* (7FPR) (purple). Representative predicted family 49 (green; g3787) protein structure  
494 aligned to Avr1/Six4 from *Fusarium oxysporum* (7T6A) (purple). **B.** Predicted EC family members with a KP6-like  
495 fold. KP6-like: representative predicted AvrLm6-like family (green; g20030) protein structure aligned to EC Zt-  
496 KP6-1 from *Zymoseptoria tritici* (6QPK). **C.** Predicted EC family members with a knottin-like fold. Knottin-like  
497 representative predicted family 11 (green; g8686) protein structure. Predicted structure of Avr9 from  
498 *Cladosporium fulvum* (pink). Gene expression data of up-regulated ECs during colonization of susceptible apple  
499 cultivar ‘Royal Gala’ are DESeq2-normalized counts, averaged from four biological replicates, with error bars  
500 representing standard deviation (hpi: hours post-inoculation; dpi: days post-inoculation). Protein structures  
501 predicted by AlphaFold2 represent the most highly expressed member of each EC family from *V. inaequalis*.  
502 Disulfide bonds coloured in yellow. N: amino (N) terminus; C: carboxyl (C) terminus. pLDDT: predicted Local  
503 Distance Difference Test score (0–100). A pLDDT score of 70–100 is indicative of medium to high confidence. A  
504 Dali Z-score above 2 indicates ‘significant similarities’ between proteins. RMSD: root-mean-square deviation.

505

## 506 **Discussion**

507 In this study, we present the first comprehensive temporal transcriptome of *V. inaequalis*  
508 during colonization of apple, covering six biotrophic time points from early (12 hpi) to late (7 dpi)  
509 infection. In doing so, we have, to our knowledge, also provided the first comprehensive *in planta*  
510 transcriptome of a subcuticular fungal pathogen. Based on our analysis of this transcriptome, we  
511 identified five host infection-specific gene expression waves for *V. inaequalis* that represent three  
512 infection stages: early, mid and mid-late infection (**Fig. 9**). These host infection-specific gene  
513 expression waves were biologically distinct from each other and were enriched for different GO terms.



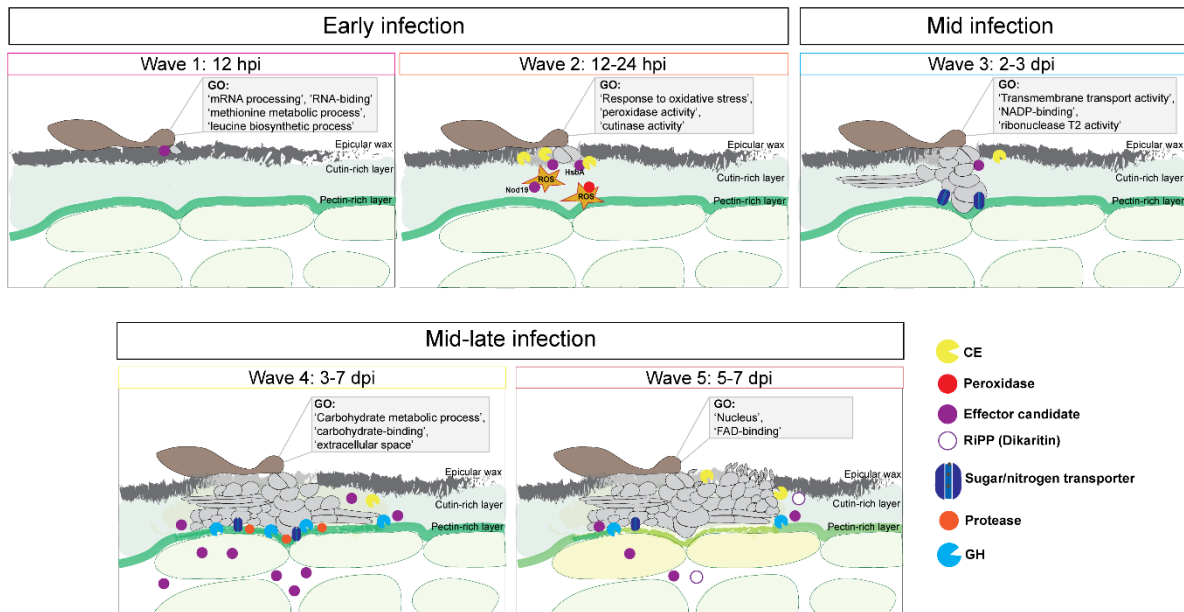

514

515 **Fig. 9** Summary of *Venturia inaequalis* host infection stages during biotrophic colonization of susceptible apple  
 516 leaves. GO: gene ontology; RiPP: ribosomally synthesized and post-translationally modified peptide; CE:  
 517 carbohydrate esterase, GH: glycoside hydrolase; hpi: hours post-inoculation; dpi: days post-inoculation.

518

519 Early infection was characterized by the expression of genes associated with metabolic  
 520 processes (wave 1) and responses to oxidative stress (wave 2). More specifically, wave 1 was enriched  
 521 for GO terms associated with RNA-binding and the synthesis of branched amino acids. Branched amino  
 522 acids play an important role in fungal pathogenesis [67-69], with leucine metabolism shown to be  
 523 crucial for host infection by *M. oryzae* and *Fusarium graminearum* [68], and methionine biosynthesis  
 524 found to be associated with the regulation of multiple cellular processes [69, 70]. The early expression  
 525 of genes associated with the synthesis of branched amino acids and methionine could suggest a similar  
 526 crucial role for these amino acids in the pathogenesis of *V. inaequalis*.

527 Wave 2 was enriched for GO terms associated with cutinase activity and the mitigation of  
 528 chemical and oxidative stress. Here, a large number of CE-encoding genes, specifically of the CE5 and  
 529 CE1 families, were up-regulated during early host colonization, which is in line with previous reports  
 530 showing that localized enzymatic hydrolysis is needed for penetration of the apple cuticle by

531 *V. inaequalis* [9, 71]. Interestingly, we observed that genes encoding proteins with an HsbA domain  
532 were co-expressed with cutinase-encoding genes during early infection, suggesting that, as was  
533 previously hypothesized, these putative hydrophobic surface-binding proteins may recruit cutinases  
534 to facilitate the degradation and digestion of the hydrophobic apple cuticle [20, 72, 73].

535 Wave 2 was additionally characterized by genes associated with oxidative stress tolerance,  
536 such as those encoding peroxidases, while genes encoding proteins with a ‘stress up-regulated Nod19’  
537 domain were also abundant, forming part of an expanded Nod19 EC family in *V. inaequalis*. The  
538 function of proteins with a stress up-regulated Nod19 domain is currently unknown. However, these  
539 proteins have been suggested to be associated with responses to abiotic and biotic stress [74-77].  
540 Based on these studies and the expression of Nod19 domain-containing genes during the early  
541 infection waves, the Nod19 proteins of *V. inaequalis* could represent a novel family of effectors that  
542 play a role in modulating oxidative stress during early infection of apple.

543 Interestingly, only around 20% of the EC genes from *V. inaequalis* were up-regulated during  
544 early infection and, with the exception of genes encoding the Nod19, HsbA and CFEM EC families,  
545 were mainly singletons. The CFEM family is defined by the presence of a CFEM domain with eight  
546 conserved cysteines. This domain is commonly found in proteins of pathogenic fungi [78] and has been  
547 shown to display diverse functions [79-82]. Some CFEM proteins promote cell death and chlorosis [79,  
548 80], while others suppress plant cell death [81] or are associated with the development of appressoria  
549 [82]. The CFEM family in *V. inaequalis* has a diverse expression profile, indicating that genes of this  
550 family might play distinct roles during host colonization. Another EC family expressed during early host  
551 colonization was the *Gas1-like* family. Recently, Gas1-like proteins have been observed to form part  
552 of the widely distributed fungal effectors with chitinase activity (EWCA) family [83]. The tertiary  
553 structure of the representative *V. inaequalis* Gas1-like protein was predicted to be structurally similar  
554 to different chitin-binding LPMOs, for which EWCA proteins have been predicted to adopt the same  
555 fold [83]. EWCA proteins are secreted chitinases that degrade immunogenic chitin fragments to

556 suppress chitin-triggered immunity in plants [83]. Thus, it is tempting to speculate that members of  
557 the Gas1-like protein family from *V. inaequalis* play a similar role.

558 Mid infection (wave 3) was characterized by the expansion of subcuticular infection structures  
559 (stromata and runner hyphae), and was enriched for GO terms associated with transmembrane  
560 transport. Given that mid infection was characterized by the development of infection structures, we  
561 suggest that this wave contains genes that are highly expressed in stromata, mostly transporters for  
562 nitrogen metabolism and morphogenesis. However, it is important to point out that the mid infection  
563 wave was not well defined, overlapping partially with the mid-late infection waves 4 and 5. This is  
564 likely due to the asynchronous nature of *V. inaequalis* infection.

565 Mid-late infection (waves 4 and 5) was characterized by an extensive change in lifestyle and  
566 nutrition by *V. inaequalis*, as well as the expression of a large number of *EC* genes. More specifically,  
567 in wave 4, there was sudden increase in the number and expression of GH-encoding genes associated  
568 with the degradation of the plant cell wall, such as the pectin-degrading GH28s. Nutrients in the cuticle  
569 are likely scarce throughout host colonization; therefore, we suggest that *V. inaequalis* obtains  
570 nutrients by degradation of the pectin-rich layer between the cuticle and epidermal cells using these  
571 enzymes [84]. Another interesting PCWDE is a GH10 endoxylanase, which is encoded by a gene that is  
572 highly expressed during this mid-late infection stage. The importance of endoxylanases in virulence  
573 has been reported in some necrotrophic and hemibiotrophic fungi [85-88], and a GH10 endoxylanase  
574 from the necrotrophic fungus *Valsa mali* is important for colonization of apple [89]. Notably, the up-  
575 regulation of genes encoding PCWDEs during mid-late infection coincided with the up-regulation of  
576 genes encoding sugar and nitrogen-associated transporters. As many fungi only utilize nitrates as a  
577 source of nitrogen during nitrogen starvation, the up-regulation of genes encoding nitrate  
578 transporters at 2 dpi likely reflects the scarcity of nitrogen available in the subcuticular environment  
579 [90] and suggests the start of nitrogen starvation for *V. inaequalis*. The up-regulated genes encoding  
580 nitrogen transporters are co-expressed with six genes encoding aspartyl proteases; these proteases  
581 may degrade extracellular apple proteins to obtain oligopeptides that are then taken up by OPT

582 transporters to be used as a nitrogen source. Co-regulation of genes encoding OPT transporters and  
583 aspartyl proteases has been reported in *Candida albicans* and *U. maydis* [34, 91].

584 Finally, wave 5, which represents the end of mid-late infection, was enriched for GO terms  
585 that could be associated with the end of the biotrophic growth phase by *V. inaequalis*. In line with this,  
586 *PCWDE* genes expressed during this late infection stage mainly encoded AA enzymes. It is possible  
587 that these AA enzymes facilitate maceration of the plant cell wall at the end of the biotrophic stage,  
588 following leaf senescence, as a means of nutrition. A subset of cutinase-encoding genes was also  
589 expressed during late infection, which may assist *V. inaequalis* to rupture through the plant cuticle to  
590 enable the release of conidiospores from infection structures.

591 Mid-late infection was also characterized by the expression of secondary metabolite genes,  
592 especially those that encode RiPPs, a class of cyclic bioactive peptides recently discovered in fungi  
593 [92]. Three dikaritin RiPP clusters were up-regulated during host colonization, and all were highly  
594 expressed during late infection at 5–7 dpi. RiPPs have been hypothesized to play a role as effectors in  
595 promoting host colonization [6]. Notably, the host-selective toxin Victorin from the necrotrophic  
596 fungal pathogen *Cochliobolus victoriae* is a RiPP that has been reported to be essential for  
597 pathogenicity in oat cultivars resistant to the biotrophic crown rust fungus *Puccinia coronata* [93].  
598 Additionally, two putative RiPP precursor genes from the endophytic fungus *Epichloë festucae* have  
599 been shown to be highly expressed during the mutualistic interaction with perennial ryegrass. In this  
600 case, deletion of these genes did not disrupt the mutualist interaction, suggesting that these RiPPs  
601 could have a redundant role or might be involved in antagonistic fungus–microbe interactions [94,  
602 95]. The late-expression profile of the *V. inaequalis* RiPPs, together with the finding that many RiPPs  
603 from plants have potent antimicrobial activity, may suggest that these peptides promote host  
604 colonization through the eradication of microbial competitors in preparation for saprobic growth  
605 inside fallen leaf litter [6, 96, 97].

606 Remarkably, the mid-late infection wave also had the largest number of up-regulated genes  
607 encoding ECs (~70%), and many of these belonged to expanded protein families. The reason behind

608 the large expansion of EC families in *V. inaequalis* is still unknown; however, it has been suggested  
609 that the expansion of effectors within families might facilitate diversification of effector function or  
610 enable avoidance of recognition by cognate host immune receptors [20]. Expansion of EC families has  
611 also been reported in other lineage-specific pathogens, such as *Blumeria graminis* [98, 99]. Given that  
612 most EC families of *V. inaequalis* did not have amino acid sequence similarity to ECs from other plant-  
613 pathogenic fungi, and because their amino acid sequences did not provide any clues regarding  
614 potential functions, we used the *de novo* folding algorithm AlphaFold2 to predict their tertiary  
615 structures. One of the main limitations when using AlphaFold2 is that proteins with low numbers of  
616 homologous sequences in public databases normally result in predictions with low confidence scores.  
617 In an attempt to overcome this limitation, we generated custom multiple sequence alignments  
618 (MSAs), which greatly improved prediction scores (**Additional file 23: Fig. S12**). In total, we were able  
619 to confidently predict the tertiary structures of ~75% of EC families and 65% of singletons up-regulated  
620 *in planta*. Strikingly, many of the EC families had predicted structural similarity to Avr effectors from  
621 other plant-pathogenic fungi. This was in addition to ECs from *V. inaequalis* that had amino acid  
622 sequence similarity to Avr or candidate Avr effectors from *V. dahliae* (Ave1), *L. maculans* (AvrLm6),  
623 and *C. fulvum* (Ecp6 and Ecp10-1). Interestingly, the genes encoding these EC families were  
624 predominantly expressed during mid-late infection, suggesting that they may play a key role in the  
625 establishment and maintenance of biotrophy.

626 The largest EC family with structural similarity to Avr effectors was the MAX-like effector  
627 family, which has undergone drastic expansion in *V. inaequalis* (family 1, 75 members). In *M. oryzae*,  
628 Avrs in the MAX effector superfamily have been shown to be translocated into plant cells, where they  
629 are recognized by NLR R proteins [52, 55, 100-103]. Of these, Avr-PikD and Avr1-CO39 directly interact  
630 with their corresponding NLR R proteins. This is mediated through an interaction with a heavy metal-  
631 associated (HMA) domain that is integrated into the R protein itself, albeit through different  
632 interactions. Remarkably, it has recently been shown that the MAX effector Avr-Pik binds and  
633 stabilizes an HMA protein from rice to modulate host immunity [104]. Altogether, the MAX fold could

634 be well suited to interactions with HMA domains [105, 106]. It is therefore tempting to speculate that  
635 members of the MAX-like effector family from *V. inaequalis* are translocated into the plant cell, where  
636 they interact with HMA domain-containing proteins of apple involved in plant defence. In terms of  
637 expression, the *V. inaequalis* MAX-like genes are expressed at a later infection time point than the  
638 *M. oryzae* MAX effectors [53], which are expressed during early infection [53]. This difference in  
639 expression could be associated with the extended biotrophic phase of *V. inaequalis*, when compared  
640 to *M. oryzae*, which is an intracellular hemibiotrophic fungus.

641 Also identified in *V. inaequalis* with structural similarity to Avr and EC proteins from other  
642 plant-pathogenic fungi was the ToxA-like family. In total, three EC families and one singleton were  
643 predicted to adopt a ToxA-like fold in *V. inaequalis*. The ToxA-like structural superfamily includes the  
644 necrotrophic effector ToxA from *P. tritici-repentis* [58, 107], as well as the Avr effectors Avr2 from *F.*  
645 *oxysporum* [59, 108] and AvrL567 (AvrLm567-A and AvrLm567-D) [109, 110] from *M. lini*. Although all  
646 members of the ToxA-like structural family described above have been shown to be translocated into  
647 plant cells [108, 111-113], it remains to be determined if this is the case for members of the ToxA-like  
648 superfamily from *V. inaequalis*. Certainly, as R proteins from apple active against *V. inaequalis* are  
649 known to be either a PRR (Rvi6) or an NLR (Rvi15) [114, 115], it seems likely that a subset of Avr from  
650 this fungus will likely be translocated into plants cells.

651 A third structural superfamily that was identified in *V. inaequalis* was the LARS-like  
652 superfamily [62]. We identified two families that have the general LARS fold, common to the Avr  
653 effectors AvrLm4-7 [61], AvrLm5-7 and AvrLm3 from *L. maculans*, as well as the Avr effector candidate  
654 Ecp11-1 from *C. fulvum* [62]. As in *V. inaequalis*, the LARS effector genes of *L. maculans* and *C. fulvum*  
655 are expressed during biotrophic host colonization [41, 62]. The *V. inaequalis* LARS-like effectors have  
656 the same predicted topology as the abovementioned effectors, with a variable number of  $\beta$ -sheets,  
657 but are quite different at the amino acid level and do not share the previously described conserved  
658 WR(F/L/V)(R/K) motif [62]. Another family in *V. inaequalis*, the Six4-like family, was predicted to adopt

659 the two-domain FOLD-like structure, recently identified in *F. oxysporum* [43]. The C-domains of these  
660 effectors also have structural similarity to proteins from the ToxA-like structural family [43].

661 Two other folds were found to be abundant among ECs of *V. inaequalis* that were encoded by  
662 genes expressed during the mid infection wave. These were the ferredoxin-like/KP6-like and knottin-  
663 like folds. Notably, the AvrLm6-like family, including the Avr effector AvrLm6 from *L. maculans*, as well  
664 as the candidate effector Zt-KP6-1 (6qpk) from *Z. tritici*, appear to adopt the KP6-like fold [49]. This  
665 fold was first described in the KP6 protein from the P6 virus from *U. maydis*, an antifungal toxic protein  
666 [47, 48]. Similarly, different ECs from *C. fulvum* and a necrosis-inducing effector from *Cercospora*  
667 *beticola* are predicted to adopt this fold [41, 116]. Intriguingly, through structural modelling, the  
668 ferredoxin-like fold was also found to be the most abundant fold in the *M. oryzae* secretome, and was  
669 predicted for the BAS4 effector protein from this fungus [117]. Altogether, this suggests that this  
670 ferredoxin/KP6-like fold may be a widely conserved structural family in different phytopathogens.

671 In terms of ECs that had a predicted knottin-like fold, family 11 of *V. inaequalis*, along with  
672 one singleton, were identified. Knottins are small, ultra-stable proteins with at least three disulfide  
673 bridges that form an intramolecular knot known to provide stability in hostile conditions such as the  
674 plant apoplast [118]. Current evidence suggests that multiple fungal effectors adopt this fold. Indeed,  
675 as previously suggested based on NMR [66] and cysteine bond connectivity [65] data, we predicted  
676 that Avr9, an Avr effector from *C. fulvum*, adopts a knottin fold. Furthermore, an EC from *Melampsora*  
677 *larici-populina*, MLP124266, which is a homolog of AvrPm4, an Avr effector from *M. lini*, was recently  
678 shown to adopt this fold [119]. The other knottin-like families identified in our study (families 12, 24  
679 and 35) appear to adopt a fold resembling defensins, similar to the VdAMP3 effector of *V. dahliae*,  
680 which has antifungal activity and facilitates microsclerotia formation [97]. Whether the ECs from  
681 *V. inaequalis* with KP6/ferredoxin-like and knottin-like folds also possess antimicrobial activity remains  
682 to be determined, but could be a future focus of research.

683 Taken together, our study on *V. inaequalis*, along with previous studies on effector proteins  
684 from *M. oryzae*, *F. oxysporum* and other fungi [43, 53, 62, 117, 120], reinforce the idea that fungal



685 effectors are often sequence-diverse, but share a limited number of structural folds. The presence of  
686 common structural folds in effectors without obvious sequence similarity could be the result of  
687 diversifying selection, where the effectors have evolved rapidly to a point where almost all amino acid  
688 sequence similarity, with the exception of residues involved in the maintenance of the overall  
689 structural fold, is lost [53]. Alternatively, the appearance of common folds could be the result of  
690 convergent evolution, indicating that similar folds have evolved independently in different fungi [53].  
691 Common protein folds might have arisen in many fungal effector proteins as they provide a stable  
692 structural scaffold that is well suited to hostile plant environments and/or for interaction with  
693 conserved host targets. Future knowledge about the distribution of these folds among  
694 phytopathogens and the functional characterization of these effectors, will shed more light on this  
695 intriguing topic.

696

## 697 **Conclusions**

698 In conclusion, we have performed the first comprehensive gene expression analysis of a subcuticular  
699 pathogen during host plant colonization, which will provide valuable new insights into the molecular  
700 mechanisms underpinning subcuticular growth by this largely understudied class of fungi, including  
701 *V. inaequalis*. In conjunction with structural modelling, we have also provided an enriched list of ECs  
702 from which effectors and Avr effectors of *V. inaequalis* can be identified and functionally characterized  
703 and, in particular, have provided further evidence that many fungal effectors are highly diverse in  
704 sequence, but very conserved at the structural level. The identification of ECs from *V. inaequalis* with  
705 sequence and/or structural similarity to Avr effectors from other plant-pathogenic fungi is of great  
706 interest as, to date, there are no publications reporting the cloning of Avr effector genes from this  
707 fungus. The identification of these Avr effector genes is of paramount importance, as they can provide  
708 information on how *V. inaequalis* overcomes or suppresses *R* gene-mediated resistance in apple, and  
709 can enable the real-time detection of resistance-breaking strains in the orchard. Should Avr effectors  
710 of *V. inaequalis* belong to expanded protein families, it may be possible to engineer their cognate R

711 proteins to recognize features common to the structural fold (direct recognition) or to monitor specific  
712 host components targeted by multiple members of the Avr family (indirect recognition). Indeed, such  
713 an approach could also be applied more globally to provide resistance against multiple plant-  
714 pathogenic fungi possessing effectors with shared effector folds or host virulence targets. Certainly,  
715 with the recent development of CRISPR-Cas9 technology in *V. inaequalis* [121], the functional  
716 characterization of ECs, and in particular those that form part of expanded EC families, is now possible.

717

## 718 **Materials and methods**

### 719 ***V. inaequalis* isolate**

720 The race (1) *V. inaequalis* isolate MNH120, also known as ICMP 13258 and Vi1 [20, 122], was used in  
721 this study.

722

### 723 **Growth in culture for RNA sequencing**

724 *V. inaequalis* was grown as a lawn culture from conidia on cellophane membranes (Waugh Rubber  
725 Bands, Wellington, New Zealand) [123] overlaying potato dextrose agar (PDA; Difco™, NJ, USA) at 20°C  
726 for 7 days under white fluorescent lights (4,300 K) with a 16 h light/8 h dark photoperiod. Four culture  
727 plates, representing four independent biological replicates, were then flooded with 1 mL sterile  
728 distilled water and the fungal biomass scraped from the membrane surface using a sterile cell  
729 spreader. Following this step, fungal suspensions were transferred to independent microcentrifuge  
730 tubes, pelleted by centrifugation at 21,000 x g for 1 min, snap frozen in liquid nitrogen, and then  
731 ground to a powder in preparation for RNA extraction.

732

### 733 **Plant infection assays for RNA sequencing and microscopy**

734 Seeds from open-pollinated *M. x domestica* cultivar 'Royal Gala' (Hawke's Bay, New Zealand) were  
735 germinated at 4°C in moist vermiculite with 100 mg/ml Thiram fungicide (Kiwicare Corporation  
736 Limited; Christchurch, New Zealand) for approximately two months in the dark. Germinated seedlings

737 were planted in potting mix (Daltons™ premium potting mix; Daltons, Matamata, New Zealand) and  
738 grown under a 16 h light–8 h dark cycle with a Philips SON-T AGRO 400 Sodium lamp, at 20°C with  
739 ambient humidity. Inoculations were performed on freshly un-furled detached leaves from 4- to 6-  
740 week old apple seedlings, as described previously [124], with the exception that 5 µl droplets of  
741 conidial suspension ( $1 \times 10^5 \text{ ml}^{-1}$ ) were used to cover the entire leaf surface. At 12 and 24 hpi, as well  
742 as 2, 3, 5 and 7 dpi, four infected leaves, each from an independent seedling, were sampled to give  
743 four biological replicates. A microscopic evaluation of infection was then performed on harvested tips  
744 from these leaves. Here, leaf tips were cleared and stained according to [125], and then visualised by  
745 bright-field microscopy, with images captured using a Leica DFC 295 digital camera and the Leica  
746 Application Suite X (LAS X). Immediately following tip harvesting, leaves were snap frozen in liquid  
747 nitrogen, and then ground to a powder in preparation for RNA extraction.

748

#### 749 **RNA extraction and sequencing**

750 Total RNA was extracted from samples of *V. inaequalis* grown in culture, as well as infected leaves,  
751 using a Spectrum™ Plant Total RNA Kit (Sigma-Aldrich, St. Louis, MO, USA), with DNA subsequently  
752 removed using DNase I (Invitrogen™, Thermo Fisher Scientific, MA, USA). RNA concentration and  
753 purity were quantified using a Nanodrop ND-1000 Spectrophotometer (NanoDrop Technologies,  
754 Rockland, DE, USA), while RNA integrity was assessed on the Agilent 2100 Bioanalyser (Agilent  
755 Technologies, Waldbronn, Germany) using an Agilent RNA 6000 Nano Kit in conjunction with Agilent  
756 2100 Bioanalyzer software. Genomic DNA contamination was excluded by visualisation of RNA on a  
757 0.8% agarose gel and absence of polymerase chain reaction (PCR) amplification products specific to  
758 the *actin* gene of apple (primers RE45 [TGACCGAATGAGCAAGGAAATTACT] and RE64  
759 [TACTCAGCTTTGGCAATCCACATC]) [14]. Following these quality control checks, total RNA from each  
760 of the samples was sequenced on a HiSeq X platform at Novogene (Beijing, China), via the Massey  
761 Genome Service facility (Palmerston North, New Zealand; project number MGS00286). Here, only  
762 those RNA samples with an RNA Integrity Number (RIN) value of  $\geq 3.5$  were sequenced.

763

## 764 **Gene prediction**

765 The genome sequence and associated gene annotations of *V. inaequalis* isolate MNH120 [20] were  
766 downloaded from the Joint Genome Institute MycoCosm portal  
767 (<https://mycocosm.jgi.doe.gov/Venin1/Venin1.home.html>). New genes were predicted to  
768 accommodate genes that may have been missed in the initial annotation (summarized in **additional**  
769 **file 2: Fig S1**). For this purpose, we used a three-step approach. In the first step, coding sequences  
770 (CDSs) from *V. inaequalis* isolate 05/172, which were predicted as part of a previous study by [19],  
771 were downloaded from the National Center for Biotechnology Information (NCBI;  
772 <https://www.ncbi.nlm.nih.gov/nuccore/QFBF00000000.1/>) and mapped to the MNH120 genome  
773 using GMAP v2021-02-22 [126]. Here, CDSs from 05/172 were used instead of CDSs previously  
774 predicted for MNH120 [20], as the former was deemed to contain a higher number of CDSs  
775 corresponding to *EC* genes. In the second step, good quality RNA-seq reads (see RNA-seq read analysis  
776 section) from one biological replicate of each time point of *V. inaequalis* grown *in planta* and in culture  
777 were mapped to the MNH120 genome using HISAT2 v2.2.1 [127, 128], with unmapped reads filtered  
778 out using SAMtools v9.2.0 [129]. Then, a genome-guided *de novo* transcriptome assembly was  
779 performed with reads mapped to the *V. inaequalis* genome using Trinity v2.12.0 [130]. Likely CDS  
780 regions were identified using Transdecoder v5.5.0 (<https://github.com/TransDecoder/TransDecoder>)  
781 in conjunction with a minimum length open frame (ORF) of 50 amino acids. To maximize the  
782 identification of ORFs encoding proteins with characterized functional domains, translated ORFs were  
783 scanned against the Pfam database. Additionally, to capture as many ORFs encoding ECs as possible,  
784 translated ORFs were scanned against a list of putative effector proteins identified by [20],  
785 supplemented with an in-house database of putative MNH120 effector proteins (de la Rosa and  
786 Mesarich, unpublished). Finally, in the third step, the original gene prediction for *V. inaequalis* isolate  
787 MNH120 [20], together with the newly annotated CDSs from steps 1 and 2, were loaded as different  
788 tracks in Geneious v9.05 [131], and manual curation was performed to create consensus gene

789 predictions. The aim of this pipeline was to predict as many genes as possible. As a consequence, it is  
790 likely that many spurious genes were predicted.

791

## 792 **Annotation of protein functions**

793 Protein functional annotations were predicted using InterProScan v5.51-85.0 in conjunction with the  
794 Pfam, HAMAP, MOBIDB, PIRSF, PROSITE and SUPERFAMILY tools [132], while GO class predictions  
795 were carried out using Pannzer2 [133]. N-terminal signal peptides were predicted using SignalP v5.0  
796 [134] and transmembrane (TM) domains were predicted using TMHMM v2.0 [135]. CAZymes were  
797 predicted using dbCAN2 in conjunction with the Hotpep, HMMER and DIAMOND tools [136]. Only  
798 CAZymes predicted with at least two of the three tools were retained for further analysis. Putative  
799 PCWDEs were manually identified based on their CAZy classification, KEGG description and InterPro  
800 annotation. Secondary metabolite clusters were predicted using antiSMASH v6.0.1 for fungi [137-142]  
801 and RiPP gene clusters in *V. inaequalis* were manually identified (**Additional file 24: S1 Text**), RiPP  
802 clusters were defined by the presence of a DUF3328 domain and precursor gene (i.e. a gene that  
803 encodes a precursor peptide with an N-terminal signal peptide, followed by one or more tandem  
804 sequence repeats that are often separated by putative kexin protease cleavage sites).

805

## 806 **Prediction of effector candidates and effector candidate families**

807 Small proteins of  $\leq 400$  amino acid residues in length with a predicted N-terminal signal peptide, but  
808 without a predicted transmembrane domain (TM) or endoplasmic reticulum (ER) retention motif  
809 (HDEL/KDEL), were annotated as ECs. The list of ECs was supplemented with proteins of  $>400$  amino  
810 acids in length with a predicted N-terminal signal peptide, but no predicted TM domain or ER retention  
811 motif, provided that they were predicted to be an effector using effectorP v3.0 [143]. ECs were  
812 grouped into protein families using spectral clustering SCPS 0.9.8 [144]. The identified protein families  
813 were then manually curated by eye, taking in to account conservation of the N-terminal signal peptide  
814 sequence, cysteine spacing, as well as conserved functional domains identified with InterProScan

815 v5.51-85.0. To further refine the list of ECs, proteins with an enzymatic annotation by InterProScan  
816 v5.51-85.0 were discarded. In cases where only one or two ECs from a family were predicted to have  
817 an enzymatic domain, the EC was retained. To determine whether the ECs had amino acid sequence  
818 similarity to other proteins, a BLASTp analysis using an e-value threshold of 0.05 was performed  
819 against the NCBI non-redundant (nr) protein database.

820

### 821 **RNA-seq read analysis**

822 Methods associated with this section are summarized in **additional file 2: Fig S1**. As a starting point  
823 for the analysis of RNA-seq reads, a mappability mask was applied to the *V. inaequalis* MNH120  
824 genome to prevent the multimapping of reads to repetitive genomic regions  
825 (<http://lh3lh3.users.sourceforge.net/download/seqbility-20091110.tar.bz2>). Raw RNA-seq reads  
826 were then filtered, in which adapter sequences, as well as reads with >10% Ns or ≥50% low quality  
827 (Qscore: 5) bases, were removed. Quality of all reads was then checked using fastQC v0.11.9 [145].  
828 Next, filtered RNA-seq reads from all samples were mapped to the masked MNH120 genome using  
829 HISAT2 v2.2.1 [127, 128]. Here, reads were filtered with SAMtools v9.2.0 [129] to keep only those  
830 reads that mapped to the fungal genome. Uniquely mapped reads were counted using featureCounts  
831 from SubRead package v2.0.0 [146]. Results from all steps of the RNA-seq analysis were aggregated  
832 for quality control assessment using MultiQC v1.11 [147].

833

### 834 **Differential gene expression and clustering**

835 The count matrix was imported to R and a differential gene expression analysis was performed with  
836 DESeq2 package v1.32.0 [148]. Pairwise comparisons from all samples were performed and genes with  
837 log<sub>2</sub>fold change of 1.5 and a *p* value of 0.01 during at least one *in planta* infection time point, relative  
838 to growth in culture, were considered to be significantly differentially expressed. A PCA plot was then  
839 generated using the PCA function of the DESeq2 package. Genes that were identified to be up-  
840 regulated at one or more *in planta* infection time points were selected for hierarchical clustering. For

841 clustering, expression counts were normalized using the rlog method from the DESeq2 package and  
842 scaled. Hierarchical clustering of the genes was performed using the hclust function, method Ward.D2  
843 and Euclidian distance. Visualization of gene expression clusters/waves was performed using ggplots2  
844 v3.3.5 [149], while gene expression heatmaps were generated using Complexheatmap v2.9.1 [150].  
845 To further investigate the co-expression of genes inside a wave, their correlation was calculated using  
846 Pearson method.

847

#### 848 **GO and Pfam term enrichment analysis**

849 GO predictions from Pannzer2 [133] with a predictive positive value (PPV) >5 were used for a GO term  
850 enrichment analysis across the five distinct gene expression waves. The GO term enrichment analysis  
851 was performed with topGO package v2.44.0 [151], using the total set of genes employed for clustering  
852 as background and a Fisher's exact test for all GO terms: Biological Process (BP), Cellular Component  
853 (CC) and Molecular Function (MF). GO enrichment analysis results were visualized using ggplots2  
854 v3.3.5 [149]. An enrichment test for Pfam domains was performed using a Fisher's exact test, with all  
855 genes targeted in the clustering analysis used as background.

856

#### 857 **Structural modelling of protein tertiary structures**

858 AlphaFold2 [152], in conjunction with the ColabFold notebook [153] and default parameters, was used  
859 to predict the protein tertiary structures of EC family members from *V. inaequalis*. Here, only those  
860 family members that were encoded by genes up-regulated *in planta*, relative to growth in culture,  
861 were used in this analysis, with only the most highly expressed member targeted for prediction (i.e.  
862 as a family representative). In each case, the mature amino acid sequence of the EC (i.e. without its  
863 predicted N-terminal peptide) was used as input. For the Avr1/Six4-like family, the published pro-  
864 domain [43] was also removed. For those ECs that had <30 proteins with amino acid sequence  
865 similarity in the NCBI database, as identified by a BLASTp analysis in conjunction with an e-value  
866 threshold of  $\leq 0.05$ , a custom MSA was generated and used as input. To generate custom MSAs, mature

867 EC family members and similar proteins identified through the BLASTp analysis were aligned using  
868 Clustal Omega [154, 155], with alignments subsequently converted to the a3m format using ToolSeq  
869 [156, 157]. The only exception was for members of the Avr1/Six4-like family. Here, in an attempt to  
870 improve the structural prediction, the *F. oxysporum* Six4 and Six3 proteins were manually added to  
871 the input sequences to generate a custom MSA, even though these proteins were not identified in the  
872 initial BLASTp similarity search. For EC singletons, protein tertiary structures were predicted using  
873 AlphaFold2 open source code version 2.0.1 and 2.1.0 [152], with preset casp14, max\_template\_date:  
874 2020-05-14, using mature protein sequences as input. Again, only those ECs that were encoded by  
875 genes up-regulated *in planta*, relative to growth in culture, were used in this analysis. All predicted  
876 protein tertiary structures with a pLDDT score of 70 or higher were considered confident predictions.  
877 Protein structures with an pLDDT score of 50–60 that also had an intrinsically disordered region  
878 predicted with MobiDB-lite [158] or PrDos [159] were also considered confident predictions.

879         Predicted EC protein tertiary structures were screened against the Research Collaboratory for  
880 Structural Bioinformatics (RCSB) PDB database to identify proteins with similar folds using the Dali  
881 server [45]. Here, all hits with a Z-score of  $\geq 2$  were considered to be similar. Protein tertiary structures  
882 were visualized and aligned using PyMol v2.5, in conjunction with the alignment plugin tool CEalign  
883 [160]. To further investigate similarities between protein tertiary structures, TM-align [161] was used  
884 to calculate root-mean-square deviation (RMSD). Finally, the general fold of confidently predicted  
885 protein tertiary structures was investigated using RUPEE [162, 163] against the SCOPe v2.08 database  
886 [63, 164]. Proteins predicted to have a knottin fold in the SCOPe database were assessed using Knotter  
887 3D to determine whether they had a true knottin structure [118].

888

#### 889 **Funding**

890 MRF and CHM were supported by the Marsden Fund Council from Government funding (project ID  
891 17-MAU-100), managed by Royal Society Te Apārangi. JKB and BM received funding from The New



892 Zealand Institute for Plant and Food Research Limited, Strategic Science Investment Fund, Project  
893 number: 12070.

894

### 895 **Availability of data and materials**

896 The raw RNA-seq data generated in this study, as well as the count matrix and DESeq2-normalized  
897 read counts, have been deposited in the NCBI Gene Expression Omnibus (GEO), and are accessible  
898 through GEO Series accession number (GSE198244). The *V. inaequalis* MNH120 gene annotations and  
899 associated proteins sequences generated in this study, as well as the output of AlphaFold2 (open  
900 source or ColabFold) with the PDB files for the predicted ECs tertiary structures are available at zenodo  
901 (10.5281/zenodo.6233645).

902

### 903 **Acknowledgements**

904 We acknowledge use of the New Zealand eScience Infrastructure (NeSI) high-performance computing  
905 facilities, as well as their technical support and training services. In particular, we thank Dinindu  
906 Senanayake for his consulting support on the high-throughput prediction of protein tertiary  
907 structures. New Zealand's national computing facilities are provided by NeSI and are funded jointly by  
908 NeSI's collaborator institutions and through the Ministry of Science & Innovation's Research  
909 Infrastructure programme. URL: <http://www.nesi.org.nz>. We thank Drs Erik Rikkerink and Jay  
910 Jayaraman for critically reviewing the manuscript, and Dr Simon Williams for providing the *F.*  
911 *oxysporum* Avr1 and Avr3 protein structure files ahead of public release.

912

### 913 **References**

- 914 1. Ristaino JB, Anderson PK, Bebbler DP, Brauman KA, Cunniffe NJ, Fedoroff NV, Finegold C,  
915 Garrett KA, Gilligan CA, Jones CM *et al*: **The persistent threat of emerging plant disease**  
916 **pandemics to global food security**. *Proceedings of the National Academy of Sciences* 2021,  
917 **118**(23):e2022239118.
- 918 2. Cook DE, Mesarich CH, Thomma BPHJ: **Understanding plant immunity as a surveillance**  
919 **system to detect invasion**. *Annual Review of Phytopathology* 2015, **53**(1):541-563.

- 920 3. Macho Alberto P, Zipfel C: **Plant PRRs and the activation of innate immune signaling.**  
921 *Molecular Cell* 2014, **54**(2):263-272.
- 922 4. Lolle S, Stevens D, Coaker G: **Plant NLR-triggered immunity: from receptor activation to**  
923 **downstream signaling.** *Current Opinion in Immunology* 2020, **62**:99-105.
- 924 5. Bolton MD: **Primary metabolism and plant defense—Fuel for the fire.** *Molecular Plant-*  
925 *Microbe Interactions* 2009, **22**(5):487-497.
- 926 6. Rocafort M, Fudal I, Mesarich CH: **Apoplasmic effector proteins of plant-associated fungi and**  
927 **oomycetes.** *Current Opinion in Plant Biology* 2020, **56**:9-19.
- 928 7. Lo Presti L, Lanver D, Schweizer G, Tanaka S, Liang L, Tollot M, Zuccaro A, Reissmann S,  
929 Kahmann R: **Fungal effectors and plant susceptibility.** *Annual Review of Plant Biology* 2015,  
930 **66**(1):513-545.
- 931 8. Rovenich H, Boshoven JC, Thomma BPHJ: **Filamentous pathogen effector functions: of**  
932 **pathogens, hosts and microbiomes.** *Current Opinion in Plant Biology* 2014, **20**:96-103.
- 933 9. Bowen JK, Mesarich CH, Bus VG, Beresford RM, Plummer KM, Templeton MD: ***Venturia***  
934 ***inaequalis*: the causal agent of apple scab.** *Molecular Plant Pathology* 2011, **12**(2):105-122.
- 935 10. Le Cam B, Parisi L, Arene L: **Evidence of two formae speciales in *Venturia inaequalis*,**  
936 **responsible for apple and pyracantha scab.** *Phytopathology* 2002, **92**(3):314-320.
- 937 11. Le Cam B, Sargent D, Gouzy J, Amselem J, Bellanger M-N, Bouchez O, Brown S, Caffier V, De  
938 Gracia M, Debuchy R *et al*: **Population genome sequencing of the scab fungal species**  
939 ***Venturia inaequalis*, *Venturia pirina*, *Venturia aucupariae* and *Venturia asperata*.** *G3: Genes,*  
940 *Genomes, Genetics* 2019, **9**(8):2405-2414.
- 941 12. Khajuria YP, Kaul S, Wani AA, Dhar MK: **Genetics of resistance in apple against *Venturia***  
942 ***inaequalis* (Wint.) Cke.** *Tree Genetics & Genomes* 2018, **14**(2):16.
- 943 13. Thakur K, Chawla V, Bhatti S, Swarnkar MK, Kaur J, Shankar R, Jha G: ***De novo* transcriptome**  
944 **sequencing and analysis for *Venturia inaequalis*, the devastating apple scab pathogen.** *PLOS*  
945 *ONE* 2013, **8**(1):e53937.
- 946 14. Kucheryava N, Bowen JK, Sutherland PW, Conolly JJ, Mesarich CH, Rikkerink EH, Kemen E,  
947 Plummer KM, Hahn M, Templeton MD: **Two novel *Venturia inaequalis* genes induced upon**  
948 **morphogenetic differentiation during infection and *in vitro* growth on cellophane.** *Fungal*  
949 *Genetics and Biology* 2008, **45**(10):1329-1339.
- 950 15. Nusbaum CJ, Keitt GW: **A cytological study of host-parasite relations of *Venturia inaequalis***  
951 **on apple leaves.** *Journal of Agricultural Research* 1938, **56**(8):595-618.
- 952 16. Shiller J, Van de Wouw AP, Taranto AP, Bowen JK, Dubois D, Robinson A, Deng CH, Plummer  
953 KM: **A large family of *AvrLm6*-like genes in the apple and pear scab pathogens, *Venturia***  
954 ***inaequalis* and *Venturia pirina*.** *Frontiers in Plant Science* 2015, **6**(980).
- 955 17. Manktelow D, Beresford R, Batchelor T, Walker J: **Use patterns and economics of fungicides**  
956 **for disease control in New Zealand apples.** In: *International Conference on Integrated Fruit*  
957 *Production: 1995.* 187-192.
- 958 18. Patocchi A, Wehrli A, Dubuis PH, Auwerkerken A, Leida C, Cipriani G, Passey T, Staples M,  
959 Didelot F, Phillion V *et al*: **Ten years of VINQUEST: first insight for breeding new apple cultivars**  
960 **with durable apple scab resistance.** *Plant Disease* 2020, **104**(8):2074-2081.
- 961 19. Passey TAJ, Armitage AD, Xu X: **Annotated draft genome sequence of the apple scab**  
962 **pathogen *Venturia inaequalis*.** *Microbiology Resource Announcements* 2018, **7**(12):e01062-  
963 01018.
- 964 20. Deng CH, Plummer KM, Jones DAB, Mesarich CH, Shiller J, Taranto AP, Robinson AJ, Kastner P,  
965 Hall NE, Templeton MD *et al*: **Comparative analysis of the predicted secretomes of Rosaceae**  
966 **scab pathogens *Venturia inaequalis* and *V. pirina* reveals expanded effector families and**  
967 **putative determinants of host range.** *BMC Genomics* 2017, **18**(1):339.
- 968 21. Prokhorchik M, Won K, Lee Y, Choi ED, Segonzac C, Sohn KH: **High contiguity whole genome**  
969 **sequence and gene annotation resource for two *Venturia nashicola* isolates.** *Molecular*  
970 *Plant-Microbe Interactions* 2019, **32**(9):1091-1094.

- 971 22. Bock CH, Chen C, Yu F, Stevenson KL, Wood BW: **Draft genome sequence of *Fusicladium***  
972 ***effusum*, cause of pecan scab.** *Standards in Genomic Sciences* 2016, **11**(1):36.
- 973 23. Chen C, Bock CH, Wood BW: **Draft genome sequence of *Venturia carpophila*, the causal agent**  
974 **of peach scab.** *Standards in Genomic Sciences* 2017, **12**:68-68.
- 975 24. Jaber MY, Bao J, Gao X, Zhang L, He D, Wang X, Wang A, Wang Z, Wang B: **Genome sequence**  
976 **of *Venturia oleaginea*, the causal agent of olive leaf scab.** *Molecular Plant-Microbe*  
977 *Interactions* 2020, **33**(9):1095-1097.
- 978 25. Fudal I, Ross S, Gout L, Blaise F, Kuhn ML, Eckert MR, Cattolico L, Bernard-Samain S, Balesdent  
979 MH, Rouxel T: **Heterochromatin-like regions as ecological niches for avirulence genes in the**  
980 ***Leptosphaeria maculans* genome: map-based cloning of *AvrLm6*.** *Molecular Plant-Microbe*  
981 *Interactions* 2007, **20**(4):459-470.
- 982 26. de Jonge R, Peter van Esse H, Maruthachalam K, Bolton MD, Santhanam P, Saber MK, Zhang  
983 Z, Usami T, Lievens B, Subbarao KV *et al*: **Tomato immune receptor *Ve1* recognizes effector**  
984 **of multiple fungal pathogens uncovered by genome and RNA sequencing.** *Proceedings of the*  
985 *National Academy of Sciences* 2012, **109**(13):5110.
- 986 27. Caffier V, Le Cam B, Expert P, Tellier M, Devaux M, Giraud M, Chevalier M: **A new scab-like**  
987 **disease on apple caused by the formerly saprotrophic fungus *Venturia asperata*.** *Plant*  
988 *Pathology* 2012, **61**(5):915-924.
- 989 28. Latham AJR, A. E.: **Development of *Cladosporium caryigenum* in pecan leaves.**  
990 *Phytopathology* 1988, **78**(8):1104-1108.
- 991 29. Lanza B, Ragnelli AM, Priore M, Aimola P: **Morphological and histochemical investigation of**  
992 **the response of *Olea europaea* leaves to fungal attack by *Spilocaea oleagina*.** *Plant*  
993 *Pathology* 2017, **66**(8):1239-1247.
- 994 30. Avrova A, Knogge W: ***Rhynchosporium commune*: a persistent threat to barley cultivation.**  
995 *Molecular Plant Pathology* 2012, **13**(9):986-997.
- 996 31. Jones P, Ayres PG: ***Rhynchosporium* leaf blotch of barley studied during the subcuticular**  
997 **phase by electron microscopy.** *Physiological Plant Pathology* 1974, **4**(2):229-233.
- 998 32. Blechert O, Debener T: **Morphological characterization of the interaction between**  
999 ***Diplocarpon rosae* and various rose species.** *Plant Pathology* 2005, **54**(1):82-90.
- 1000 33. Zhao H, Han Q, Wang J, Gao X, Xiao C-L, Liu J, Huang L: **Cytology of infection of apple leaves**  
1001 **by *Diplocarpon mali*.** *European Journal of Plant Pathology* 2013, **136**(1):41-49.
- 1002 34. Lanver D, Müller AN, Happel P, Schweizer G, Haas FB, Franitza M, Pellegrin C, Reissmann S,  
1003 Altmüller J, Rensing SA *et al*: **The biotrophic development of *Ustilago maydis* studied by RNA-**  
1004 **Seq analysis.** *The Plant Cell* 2018, **30**(2):300.
- 1005 35. Gervais J, Plissonneau C, Linglin J, Meyer M, Labadie K, Cruaud C, Fudal I, Rouxel T, Balesdent  
1006 M-H: **Different waves of effector genes with contrasted genomic location are expressed by**  
1007 ***Leptosphaeria maculans* during cotyledon and stem colonization of oilseed rape.** *Molecular*  
1008 *Plant Pathology* 2017, **18**(8):1113-1126.
- 1009 36. Bradshaw RE, Guo Y, Sim AD, Kabir MS, Chettri P, Ozturk IK, Hunziker L, Ganley RJ, Cox MP:  
1010 **Genome-wide gene expression dynamics of the fungal pathogen *Dothistroma septosporum***  
1011 **throughout its infection cycle of the gymnosperm host *Pinus radiata*.** *Molecular Plant*  
1012 *Pathology* 2016, **17**(2):210-224.
- 1013 37. Ye Y, Ozaki T, Umemura M, Liu C, Minami A, Oikawa H: **Heterologous production of asperipin-**  
1014 **2a: proposal for sequential oxidative macrocyclization by a fungi-specific DUF3328 oxidase.**  
1015 *Organic & Biomolecular Chemistry* 2019, **17**(1):39-43.
- 1016 38. Xue C, Park G, Choi W, Zheng L, Dean RA, Xu J-R: **Two novel fungal virulence genes specifically**  
1017 **expressed in appressoria of the rice blast fungus.** *The Plant Cell* 2002, **14**(9):2107-2119.
- 1018 39. Kulkarni RD, Kelkar HS, Dean RA: **An eight-cysteine-containing CFEM domain unique to a**  
1019 **group of fungal membrane proteins.** *Trends in Biochemical Sciences* 2003, **28**(3):118-121.

- 1020 40. Mesarich CH, Schmitz M, Tremouilhac P, McGillivray DJ, Templeton MD, Dingley AJ: **Structure,**  
1021 **dynamics and domain organization of the repeat protein Cin1 from the apple scab fungus.**  
1022 *Biochimica et Biophysica Acta - Proteins and Proteomics* 2012, **1824**(10):1118-1128.
- 1023 41. Mesarich CH, Ökmen B, Rovenich H, Griffiths SA, Wang C, Karimi Jashni M, Mihajlovski A,  
1024 Collemare J, Hunziker L, Deng CH *et al*: **Specific hypersensitive response-associated**  
1025 **recognition of new apoplastic effectors from *Cladosporium fulvum* in wild tomato.**  
1026 *Molecular Plant-Microbe Interactions* 2018, **31**(1):145-162.
- 1027 42. Jumper J, Evans R, Pritzel A, Green T, Figurnov M, Ronneberger O, Tunyasuvunakool K, Bates  
1028 R, Žídek A, Potapenko A *et al*: **Highly accurate protein structure prediction with AlphaFold.**  
1029 *Nature* 2021, **596**(7873):583-589.
- 1030 43. Yu DS, Outram MA, Smith A, McCombe CL, Khambalkar PB, Rima SA, Sun X, Ma L, Ericsson DJ,  
1031 Jones DA *et al*: **The structural repertoire of *Fusarium oxysporum* f. sp. *lycopersici* effectors**  
1032 **revealed by experimental and computational studies.** *bioRxiv* 2021:2021.2012.2014.472499.
- 1033 44. Amoozadeh S, Johnston J, Meisrimler C-N: **Exploiting structural modelling tools to explore**  
1034 **host-translocated effector proteins.** *International Journal of Molecular Sciences* 2021,  
1035 **22**(23):12962.
- 1036 45. Holm L: **Using dali for protein structure comparison.** *Methods in Molecular Biology* 2020,  
1037 **2112**:29-42.
- 1038 46. Huber A, Hajdu D, Bratschun-Khan D, Gáspári Z, Varbanov M, Philippot S, Fizil Á, Czajlik A, Kele  
1039 Z, Sonderegger C *et al*: **New antimicrobial potential and structural properties of PAFB: a**  
1040 **cationic, cysteine-rich protein from *Penicillium chrysogenum* Q176.** *Scientific Reports* 2018,  
1041 **8**(1):1751.
- 1042 47. Li N, Erman M, Pangborn W, Duax WL, Park C-M, Bruenn J, Ghosh D: **Structure of *Ustilago***  
1043 ***maydis* Killer Toxin KP6  $\alpha$ -Subunit: A multimeric assembly with a central pore.** *The Journal*  
1044 *of Biological Chemistry* 1999, **274**(29):20425-20431.
- 1045 48. Allen A, Chatt E, Smith TJ: **The atomic structure of the virally encoded antifungal protein,**  
1046 **KP6.** *Journal of Molecular Biology* 2013, **425**(3):609-621.
- 1047 49. Padilla A, Hoh, F., De guillen, K.: **Zt-KP6-1: an effector from *Zymoseptoria tritici*.** 2019.
- 1048 50. Sánchez-Vallet A, Saleem-Batcha R, Kombrink A, Hansen G, Valkenburg D-J, Thomma BPHJ,  
1049 Mesters JR: **Fungal effector Ecp6 outcompetes host immune receptor for chitin binding**  
1050 **through intrachain LysM dimerization.** *eLife* 2013, **2**:e00790.
- 1051 51. Hoh F, Padilla, A., De Guillen, K.: **New MAX effector from *Magnaporthe oryzae*.** 2019.
- 1052 52. Li W, Wang B, Wu J, Lu G, Hu Y, Zhang X, Zhang Z, Zhao Q, Feng Q, Zhang H *et al*: **The**  
1053 ***Magnaporthe oryzae* avirulence gene *AvrPiz-t* encodes a predicted secreted protein that**  
1054 **triggers the immunity in rice mediated by the blast resistance gene *Piz-t*.** *Molecular Plant-*  
1055 *Microbe Interactions* 2009, **22**(4):411-420.
- 1056 53. de Guillen K, Ortiz-Vallejo D, Gracy J, Fournier E, Kroj T, Padilla A: **Structure analysis uncovers**  
1057 **a highly diverse but structurally conserved effector family in phytopathogenic fungi.** *PLOS*  
1058 *Pathogens* 2015, **11**(10):e1005228.
- 1059 54. Ose T, Oikawa A, Nakamura Y, Maenaka K, Higuchi Y, Satoh Y, Fujiwara S, Demura M, Sone T,  
1060 Kamiya M: **Solution structure of an avirulence protein, AVR-Pia, from *Magnaporthe oryzae*.**  
1061 *Journal of Biomolecular NMR* 2015, **63**(2):229-235.
- 1062 55. Zhang X, He D, Zhao Y, Cheng X, Zhao W, Taylor IA, Yang J, Liu J, Peng YL: **A positive-charged**  
1063 **patch and stabilized hydrophobic core are essential for avirulence function of AvrPib in the**  
1064 **rice blast fungus.** *The Plant Journal* 2018, **96**(1):133-146.
- 1065 56. De la Concepcion JC, Franceschetti M, Maqbool A, Saitoh H, Terauchi R, Kamoun S, Banfield  
1066 MJ: **Polymorphic residues in rice NLRs expand binding and response to effectors of the blast**  
1067 **pathogen.** *Nature Plants* 2018, **4**(8):576-585.
- 1068 57. Nyarko A, Singarapu KK, Figueroa M, Manning VA, Pandelova I, Wolpert TJ, Ciuffetti LM,  
1069 Barbar E: **Solution NMR structures of *Pyrenophora tritici-repentis* ToxB and its inactive**



- 1070 **homolog reveal potential determinants of toxin activity.** *The Journal of Biological Chemistry*  
1071 2014, **289**(37):25946-25956.
- 1072 58. Sarma GN, Manning VA, Ciuffetti LM, Karplus PA: **Structure of Ptr ToxA: An RGD-containing**  
1073 **host-selective toxin from *Pyrenophora tritici-repentis*** *The Plant Cell* 2005, **17**(11):3190-3202.
- 1074 59. Di X, Cao L, Hughes RK, Tintor N, Banfield MJ, Takken FLW: **Structure-function analysis of the**  
1075 ***Fusarium oxysporum* Avr2 effector allows uncoupling of its immune-suppressing activity**  
1076 **from recognition.** *New Phytologist* 2017, **216**(3):897-914.
- 1077 60. Guncar G, Wang C-IA, Forwood JK, Teh T, Catanzariti A-M, Ellis JG, Dodds PN, Kobe B: **The use**  
1078 **of Co<sup>2+</sup> for crystallization and structure determination, using a conventional**  
1079 **monochromatic X-ray source, of flax rust avirulence protein.** *Crystallization Communications*  
1080 2007, **63**(Pt 3):209-213.
- 1081 61. Blondeau K, Blaise F, Graille M, Kale SD, Linglin J, Ollivier B, Labarde A, Lazar N, Daverdin G,  
1082 Balesdent MH *et al*: **Crystal structure of the effector AvrLm4-7 of *Leptosphaeria maculans***  
1083 **reveals insights into its translocation into plant cells and recognition by resistance proteins.**  
1084 *The Plant Journal* 2015, **83**(4):610-624.
- 1085 62. Lazar N, Mesarich CH, Petit-Houdenot Y, Talbi N, Li de la Sierra-Gallay I, Zélie E, Blondeau K,  
1086 Gracy J, Ollivier B, Blaise F *et al*: **A new family of structurally conserved fungal effectors**  
1087 **displays epistatic interactions with plant resistance proteins.** *bioRxiv*  
1088 2020:2020.2012.2017.423041.
- 1089 63. Fox NK, Brenner SE, Chandonia J-M: **SCOPE: Structural classification of proteins-extended,**  
1090 **integrating SCOP and ASTRAL data and classification of new structures.** *Nucleic Acids*  
1091 *Research* 2014, **42**(D1):D304-D309.
- 1092 64. Dias RdO, Franco OL: **Cysteine-stabilized  $\alpha\beta$  defensins: From a common fold to antibacterial**  
1093 **activity.** *Peptides* 2015, **72**:64-72.
- 1094 65. van den Hooven HW, van den Burg HA, Vossen P, Boeren S, de Wit PJGM, Vervoort J: **Disulfide**  
1095 **bond structure of the AVR9 elicitor of the fungal tomato pathogen *Cladosporium fulvum*:**  
1096 **Evidence for a cystine knot.** *Biochemistry* 2001, **40**(12):3458-3466.
- 1097 66. Vervoort J, van den Hooven HW, Berg A, Vossen P, Vogelsang R, Joosten MHAJ, de Wit PJGM:  
1098 **The race-specific elicitor AVR9 of the tomato pathogen *Cladosporium fulvum*: a cystine knot**  
1099 **protein: Sequence-specific 1H NMR assignments, secondary structure and global fold of the**  
1100 **protein.** *FEBS Letters* 1997, **404**(2):153-158.
- 1101 67. Steyer Joel T, Downes Damien J, Hunter Cameron C, Migeon Pierre A, Todd Richard B,  
1102 Goldman Gustavo H: **Duplication and functional divergence of branched-chain amino acid**  
1103 **biosynthesis genes in *Aspergillus nidulans*.** *mBio* 2021, **12**(3):e00768-00721.
- 1104 68. Que Y, Yue X, Yang N, Xu Z, Tang S, Wang C, Lv W, Xu L, Talbot NJ, Wang Z: **Leucine biosynthesis**  
1105 **is required for infection-related morphogenesis and pathogenicity in the rice blast fungus**  
1106 ***Magnaporthe oryzae*.** *Current Genetics* 2020, **66**(1):155-171.
- 1107 69. Saint-Macary ME, Barbisan C, Gagey MJ, Frelin O, Beffa R, Lebrun MH, Droux M: **Methionine**  
1108 **biosynthesis is essential for infection in the rice blast fungus *Magnaporthe oryzae*.** *PLOS ONE*  
1109 2015, **10**(4):e0111108.
- 1110 70. Shao W, Yang Y, Zhang Y, Lv C, Ren W, Chen C: **Involvement of *BcStr2* in methionine**  
1111 **biosynthesis, vegetative differentiation, multiple stress tolerance and virulence in *Botrytis***  
1112 ***cinerea*.** *Molecular Plant Pathology* 2016, **17**(3):438-447.
- 1113 71. Koller W, Parker DM, Becker CM: **Role of cutinase in the penetration of apple leaves by**  
1114 ***Venturia inaequalis*** *Phytopathology* 1991, **81**(11):1375-1379.
- 1115 72. Ohtaki S, Maeda H, Takahashi T, Yamagata Y, Hasegawa F, Gomi K, Nakajima T, Abe K: **Novel**  
1116 **hydrophobic surface binding protein, HsbA, produced by *Aspergillus oryzae*.** *Applied and*  
1117 *Environmental Microbiology* 2006, **72**(4):2407-2413.
- 1118 73. Takahashi T, Maeda H, Yoneda S, Ohtaki S, Yamagata Y, Hasegawa F, Gomi K, Nakajima T, Abe  
1119 K: **The fungal hydrophobin RoIA recruits polyesterase and laterally moves on hydrophobic**  
1120 **surfaces.** *Molecular Microbiology* 2005, **57**(6):1780-1796.

- 1121 74. Gamas P, Niebel Fde C, Lescure N, Cullimore J: **Use of a subtractive hybridization approach**  
1122 **to identify new *Medicago truncatula* genes induced during root nodule development.**  
1123 *Molecular Plant-Microbe Interactions* 1996, **9**(4):233-242.
- 1124 75. Kimura M, Yamamoto YY, Seki M, Sakurai T, Sato M, Abe T, Yoshida S, Manabe K, Shinozaki K,  
1125 Matsui M: **Identification of Arabidopsis genes regulated by high light-stress using cDNA**  
1126 **microarray.** *Photochemistry and Photobiology* 2003, **77**(2):226-233.
- 1127 76. Doss RP: **Treatment of pea pods with Bruchin B results in up-regulation of a gene similar to**  
1128 ***MtN19*.** *Plant Physiology Biochemistry* 2005, **43**(3):225-231.
- 1129 77. Naya L, Paul S, Valdés-López O, Mendoza-Soto AB, Nova-Franco B, Sosa-Valencia G, Reyes JL,  
1130 Hernández G: **Regulation of copper homeostasis and biotic interactions by MicroRNA 398b**  
1131 **in common bean.** *PLOS ONE* 2014, **9**(1):e84416.
- 1132 78. Zhang Z-N, Wu Q-Y, Zhang G-Z, Zhu Y-Y, Murphy RW, Liu Z, Zou C-G: **Systematic analyses**  
1133 **reveal uniqueness and origin of the CFEM domain in fungi.** *Scientific Reports* 2015,  
1134 **5**(1):13032.
- 1135 79. Zhao S, Shang X, Bi W, Yu X, Liu D, Kang Z, Wang X, Wang X: **Genome-wide identification of**  
1136 **effector candidates with conserved motifs from the wheat leaf rust fungus *Puccinia triticina*.**  
1137 *Frontiers in Microbiology* 2020, **11**(1188).
- 1138 80. Zhu W, Wei W, Wu Y, Zhou Y, Peng F, Zhang S, Chen P, Xu X: **BcCFEM1, a CFEM domain-**  
1139 **containing protein with putative GPI-anchored site, is involved in pathogenicity, conidial**  
1140 **production, and stress tolerance in *Botrytis cinerea*.** *Frontiers in Microbiology* 2017, **8**(1807).
- 1141 81. Wang J-x, Long F, Zhu H, Zhang Y, Wu J-y, Shen S, Dong J-g, Hao Z-m: **Bioinformatic analysis**  
1142 **and functional characterization of CFEM proteins in *Setosphaeria turcica*.** *Journal of*  
1143 *Integrative Agriculture* 2021, **20**(9):2438-2449.
- 1144 82. Choi W, Dean RA: **The adenylate cyclase gene *MAC1* of *Magnaporthe grisea* controls**  
1145 **appressorium formation and other aspects of growth and development.** *The Plant Cell* 1997,  
1146 **9**(11):1973-1983.
- 1147 83. Martínez-Cruz J, Romero D, Hierrezuelo J, Thon M, de Vicente A, Pérez-García A: **Effectors**  
1148 **with chitinase activity (EWCAs), a family of conserved, secreted fungal chitinases that**  
1149 **suppress chitin-triggered immunity.** *The Plant Cell* 2021, **33**(4):1319-1340.
- 1150 84. Skrzydeł J, Borowska-Wykręt D, Kwiatkowska D: **Structure, assembly and function of cuticle**  
1151 **from mechanical perspective with special focus on perianth.** *International Journal of*  
1152 *Molecular Sciences* 2021, **22**(8):4160.
- 1153 85. Rafiei V, Véléz H, Tzelepis G: **The role of glycoside hydrolases in phytopathogenic fungi and**  
1154 **oomycetes virulence.** *International journal of molecular sciences* 2021, **22**(17):9359.
- 1155 86. Nguyen QB, Itoh K, Van Vu B, Tosa Y, Nakayashiki H: **Simultaneous silencing of endo- $\beta$ -1,4**  
1156 **xylanase genes reveals their roles in the virulence of *Magnaporthe oryzae*.** *Molecular*  
1157 *Microbiology* 2011, **81**(4):1008-1019.
- 1158 87. Noda J, Brito N, González C: **The *Botrytis cinerea* xylanase Xyn11A contributes to virulence**  
1159 **with its necrotizing activity, not with its catalytic activity.** *BMC Plant Biology* 2010, **10**:38.
- 1160 88. Brito N, Espino JJ, González C: **The endo-beta-1,4-xylanase xyn11A is required for virulence**  
1161 **in *Botrytis cinerea*.** *Molecular Plant-Microbe Interactions* 2006, **19**(1):25-32.
- 1162 89. Yu C, Li T, Shi X, Saleem M, Li B, Liang W, Wang C: **Deletion of Endo- $\beta$ -1,4-Xylanase *VmXyl1***  
1163 **impacts the virulence of *Valsa mali* in apple tree.** *Frontiers in Plant Science* 2018, **9**(663).
- 1164 90. Solomon PS, Tan K-C, Oliver RP: **The nutrient supply of pathogenic fungi; a fertile field for**  
1165 **study.** *Molecular Plant Pathology* 2003, **4**(3):203-210.
- 1166 91. Martínez P, Ljungdahl PO: **Divergence of Stp1 and Stp2 transcription factors in *Candida***  
1167 ***albicans* places virulence factors required for proper nutrient acquisition under amino acid**  
1168 **control.** *Molecular Cell Biology* 2005, **25**(21):9435-9446.
- 1169 92. Vogt E, Künzler M: **Discovery of novel fungal RiPP biosynthetic pathways and their**  
1170 **application for the development of peptide therapeutics.** *Applied Microbiology and*  
1171 *Biotechnology* 2019, **103**(14):5567-5581.

- 1172 93. Kessler SC, Zhang X, McDonald MC, Gilchrist CLM, Lin Z, Rightmyer A, Solomon PS, Turgeon  
1173 BG, Chooi Y-H: **Victorin, the host-selective cyclic peptide toxin from the oat pathogen**  
1174 ***Cochliobolus victoriae* is ribosomally encoded.** *Proceedings of the National Academy of*  
1175 *Sciences* 2020, **117**(39):24243.
- 1176 94. Hassing B, Winter D, Becker Y, Mesarich CH, Eaton CJ, Scott B: **Analysis of *Epichloë festucae***  
1177 **small secreted proteins in the interaction with *Lolium perenne*.** *PLOS ONE* 2019,  
1178 **14**(2):e0209463.
- 1179 95. Johnson RD, Lane GA, Koulman A, Cao M, Fraser K, Fleetwood DJ, Voisey CR, Dyer JM, Pratt J,  
1180 Christensen M *et al*: **A novel family of cyclic oligopeptides derived from ribosomal peptide**  
1181 **synthesis of an *in planta*-induced gene, *gigA*, in *Epichloë* endophytes of grasses.** *Fungal*  
1182 *Genetics and Biology* 2015, **85**:14-24.
- 1183 96. Slazak B, Kapusta M, Strömstedt AA, Słomka A, Krychowiak M, Shariatgorji M, Andrén PE,  
1184 Bohdanowicz J, Kuta E, Göransson U: **How does the sweet violet (*Viola odorata* L.) fight**  
1185 **pathogens and pests – cyclotides as a comprehensive plant host defense system.** *Frontiers*  
1186 *in Plant Science* 2018, **9**(1296).
- 1187 97. Snelders NC, Petti GC, van den Berg GCM, Seidl MF, Thomma BPHJ: **An ancient antimicrobial**  
1188 **protein co-opted by a fungal plant pathogen for *in planta* mycobiome manipulation.**  
1189 *Proceedings of the National Academy of Sciences* 2021, **118**(49):e2110968118.
- 1190 98. Sacristán S, Vigouroux M, Pedersen C, Skamnioti P, Thordal-Christensen H, Micali C, Brown  
1191 JKM, Ridout CJ: **Coevolution between a family of parasite virulence effectors and a class of**  
1192 **LINE-1 retrotransposons.** *PLOS ONE* 2009, **4**(10):e7463.
- 1193 99. Spanu PD, Abbott JC, Amselem J, Burgis TA, Soanes DM, Stüber K, Ver Loren van Themaat E,  
1194 Brown JK, Butcher SA, Gurr SJ *et al*: **Genome expansion and gene loss in powdery mildew**  
1195 **fungi reveal tradeoffs in extreme parasitism.** *Science* 2010, **330**(6010):1543-1546.
- 1196 100. Cesari S, Thilliez G, Ribot C, Chalvon V, Michel C, Jauneau A, Rivas S, Alaux L, Kanzaki H,  
1197 Okuyama Y *et al*: **The rice resistance protein pair RGA4/RGA5 recognizes the *Magnaporthe***  
1198 ***oryzae* effectors AVR-Pia and AVR1-CO39 by direct binding.** *The Plant Cell* 2013, **25**(4):1463-  
1199 1481.
- 1200 101. Yoshida K, Saitoh H, Fujisawa S, Kanzaki H, Matsumura H, Yoshida K, Tosa Y, Chuma I, Takano  
1201 Y, Win J *et al*: **Association genetics reveals three novel avirulence genes from the rice blast**  
1202 **fungal pathogen *Magnaporthe oryzae*.** *The Plant Cell* 2009, **21**(5):1573-1591.
- 1203 102. Ashikawa I, Hayashi N, Yamane H, Kanamori H, Wu J, Matsumoto T, Ono K, Yano M: **Two**  
1204 **adjacent nucleotide-binding site–leucine-rich repeat class genes are required to confer**  
1205 ***Pikm*-specific rice blast resistance.** *Genetics* 2008, **180**(4):2267.
- 1206 103. Zhang S, Wang L, Wu W, He L, Yang X, Pan Q: **Function and evolution of *Magnaporthe oryzae***  
1207 **avirulence gene *AvrPib* responding to the rice blast resistance gene *Pib*.** *Scientific Reports*  
1208 2015, **5**:11642.
- 1209 104. Oikawa K, Fujisaki K, Shimizu M, Takeda T, Saitoh H, Hirabuchi A, Hiraka Y, Białas A, Langner T,  
1210 Kellner R *et al*: **The blast pathogen effector AVR-Pik binds and stabilizes rice heavy metal-**  
1211 **associated (HMA) proteins to co-opt their function in immunity.** *bioRxiv*  
1212 2020:2020.2012.2001.406389.
- 1213 105. Guo L, Cesari S, de Guillen K, Chalvon V, Mammri L, Ma M, Meusnier I, Bonnot F, Padilla A,  
1214 Peng Y-L *et al*: **Specific recognition of two MAX effectors by integrated HMA domains in plant**  
1215 **immune receptors involves distinct binding surfaces.** *Proceedings of the National Academy*  
1216 *of Sciences* 2018, **115**(45):11637.
- 1217 106. Franceschetti M, Maqbool A, Jiménez-Dalmaroni Maximiliano J, Pennington Helen G, Kamoun  
1218 S, Banfield Mark J: **Effectors of filamentous plant pathogens: commonalities amid diversity.**  
1219 *Microbiology and Molecular Biology Reviews* 2017, **81**(2):e00066-00016.
- 1220 107. Dagvadorj B, Outram MA, Williams SJ, Solomon PS: **The necrotrophic effector ToxA from**  
1221 ***Parastagonospora nodorum* interacts with wheat NHL proteins to facilitate Tsn1-mediated**  
1222 **necrosis.** *The Plant Journal* 2022, n/a(n/a).

- 1223 108. Ma L, Cornelissen BJC, Takken FLW: **A nuclear localization for Avr2 from *Fusarium oxysporum***  
1224 **is required to activate the tomato resistance protein I-2.** *Frontiers in Plant Science* 2013, **4**:94-  
1225 94.
- 1226 109. Dodds PN, Lawrence GJ, Catanzariti A-M, Ayliffe MA, Ellis JG: **The *Melampsora lini* AvrL567**  
1227 **avirulence genes are expressed in haustoria and their products are recognized inside plant**  
1228 **cells.** *The Plant Cell* 2004, **16**(3):755-768.
- 1229 110. Wang C-IA, Gunčar G, Forwood JK, Teh T, Catanzariti A-M, Lawrence GJ, Loughlin FE, Mackay  
1230 JP, Schirra HJ, Anderson PA *et al*: **Crystal structures of flax rust avirulence proteins AvrL567-**  
1231 **A and -D reveal details of the structural basis for flax disease resistance specificity.** *The Plant*  
1232 *Cell* 2007, **19**(9):2898-2912.
- 1233 111. Rafiqi M, Gan PH, Ravensdale M, Lawrence GJ, Ellis JG, Jones DA, Hardham AR, Dodds PN:  
1234 **Internalization of flax rust avirulence proteins into flax and tobacco cells can occur in the**  
1235 **absence of the pathogen.** *The Plant Cell* 2010, **22**(6):2017-2032.
- 1236 112. Manning VA, Ciuffetti LM: **Localization of Ptr ToxA produced by *Pyrenophora tritici-repentis***  
1237 **reveals protein import into wheat mesophyll cells.** *The Plant Cell* 2005, **17**(11):3203-3212.
- 1238 113. Manning VA, Hamilton SM, Karplus PA, Ciuffetti LM: **The Arg-Gly-Asp-containing, solvent-**  
1239 **exposed loop of Ptr ToxA is required for internalization.** *Molecular Plant-Microbe*  
1240 *Interactions* 2008, **21**(3):315-325.
- 1241 114. Belfanti E, Silfverberg-Dilworth E, Tartarini S, Patocchi A, Barbieri M, Zhu J, Vinatzer BA,  
1242 Gianfranceschi L, Gessler C, Sansavini S: **The *HcrVf2* gene from a wild apple confers scab**  
1243 **resistance to a transgenic cultivated variety.** *Proceedings of the National Academy of Sciences*  
1244 2004, **101**(3):886-890.
- 1245 115. Schouten HJ, Brinkhuis J, Burgh AMvd, Schaart JG, Groenwold R, Broggin GAL, Gessler C:  
1246 **Cloning and functional characterization of the *Rvi15 (Vr2)* gene for apple scab resistance.**  
1247 *Tree Genetics & Genomes* 2013, **10**:251-260.
- 1248 116. Ebert MK, Rangel LI, Spanner RE, Taliadoros D, Wang X, Friesen TL, de Jonge R, Neubauer JD,  
1249 Secor GA, Thomma BPHJ *et al*: **Identification and characterization of *Cercospora beticola***  
1250 **necrosis-inducing effector CbNip1.** *Molecular Plant Pathology* 2021, **22**(3):301-316.
- 1251 117. Seong K, Krasileva KV: **Computational structural genomics unravels common folds and novel**  
1252 **families in the secretome of fungal phytopathogen *Magnaporthe oryzae*.** *Molecular Plant-*  
1253 *Microbe Interactions* 2021:MPMI-03-21-0071-R.
- 1254 118. Postic G, Gracy J, Périn C, Chiche L, Gelly J-C: **KNOTTIN: the database of inhibitor cystine knot**  
1255 **scaffold after 10 years, toward a systematic structure modeling.** *Nucleic Acids Research* 2018,  
1256 **46**(D1):D454-D458.
- 1257 119. de Guillen K, Lorrain C, Tsan P, Barthe P, Petre B, Saveleva N, Rouhier N, Duplessis S, Padilla A,  
1258 Hecker A: **Structural genomics applied to the rust fungus *Melampsora larici-populina* reveals**  
1259 **two candidate effector proteins adopting cystine knot and NTF2-like protein folds.** *Scientific*  
1260 *Reports* 2019, **9**(1):18084.
- 1261 120. Spanu PD: **Cereal immunity against powdery mildews targets RNase-Like Proteins associated**  
1262 **with Haustoria (RALPH) effectors evolved from a common ancestral gene.** *New Phytologist*  
1263 2017, **213**(3):969-971.
- 1264 121. Rocafort M, Arshed S, Hudson D, Sidhu JS, Bowen JK, Plummer KM, Bradshaw RE, Johnson RD,  
1265 Johnson LJ, Mesarich CH: **CRISPR-Cas9 gene editing and rapid detection of gene-edited**  
1266 **mutants using high-resolution melting in the apple scab fungus, *Venturia inaequalis*.** *Fungal*  
1267 *Biology* 2021, **126**(1):35-46.
- 1268 122. Stehmann C, Pennycook S, Plummer KM: **Molecular identification of a sexual interloper: The**  
1269 **pear pathogen, *Venturia pirina*, has sex on apple.** *Phytopathology* 2001, **91**(7):633-641.
- 1270 123. Parker D, Hilber U, Bodmer M, Smith F, Yao C, Köller W: **Production and transformation of**  
1271 **conidia of *Venturia inaequalis*.** *Phytopathology* 1995, **85**(1):87-91.



- 1272 124. Win J, Greenwood DR, Plummer KM: **Characterisation of a protein from *Venturia inaequalis***  
1273 **that induces necrosis in *Malus* carrying the *Vm* resistance gene.** *Physiological and Molecular*  
1274 *Plant Pathology* 2003, **62**(4):193-202.
- 1275 125. Bruzzese E, Hasan S: **A whole leaf clearing and staining technique for host specificity studies**  
1276 **of rust fungi.** *Plant Pathology* 1983, **32**(3):335-338.
- 1277 126. Wu TD, Watanabe CK: **GMAP: a genomic mapping and alignment program for mRNA and EST**  
1278 **sequences.** *Bioinformatics* 2005, **21**(9):1859-1875.
- 1279 127. Kim D, Langmead B, Salzberg SL: **HISAT: a fast spliced aligner with low memory requirements.**  
1280 *Nature Methods* 2015, **12**(4):357-360.
- 1281 128. Kim D, Paggi JM, Park C, Bennett C, Salzberg SL: **Graph-based genome alignment and**  
1282 **genotyping with HISAT2 and HISAT-genotype.** *Nature Biotechnology* 2019, **37**(8):907-915.
- 1283 129. Danecek P, Bonfield JK, Liddle J, Marshall J, Ohan V, Pollard MO, Whitwham A, Keane T,  
1284 McCarthy SA, Davies RM *et al*: **Twelve years of SAMtools and BCFtools.** *Gigascience* 2021,  
1285 **10**(2).
- 1286 130. Grabherr MG, Haas BJ, Yassour M, Levin JZ, Thompson DA, Amit I, Adiconis X, Fan L,  
1287 Raychowdhury R, Zeng Q *et al*: **Full-length transcriptome assembly from RNA-Seq data**  
1288 **without a reference genome.** *Nature Biotechnology* 2011, **29**(7):644-652.
- 1289 131. Kearse M, Moir R, Wilson A, Stones-Havas S, Cheung M, Sturrock S, Buxton S, Cooper A,  
1290 Markowitz S, Duran C *et al*: **Geneious Basic: an integrated and extendable desktop software**  
1291 **platform for the organization and analysis of sequence data.** *Bioinformatics* 2012,  
1292 **28**(12):1647-1649.
- 1293 132. Jones P, Binns D, Chang H-Y, Fraser M, Li W, McAnulla C, McWilliam H, Maslen J, Mitchell A,  
1294 Nuka G *et al*: **InterProScan 5: genome-scale protein function classification.** *Bioinformatics*  
1295 2014, **30**(9):1236-1240.
- 1296 133. Törönen P, Medlar A, Holm L: **PANNZER2: a rapid functional annotation web server.** *Nucleic*  
1297 *Acids Research* 2018, **46**(W1):W84-W88.
- 1298 134. Almagro Armenteros JJ, Tsirigos KD, Sønderby CK, Petersen TN, Winther O, Brunak S, von  
1299 Heijne G, Nielsen H: **SignalP 5.0 improves signal peptide predictions using deep neural**  
1300 **networks.** *Nature Biotechnology* 2019, **37**(4):420-423.
- 1301 135. Krogh A, Larsson B, von Heijne G, Sonnhammer EL: **Predicting transmembrane protein**  
1302 **topology with a hidden Markov model: application to complete genomes.** *Journal of*  
1303 *Molecular Biology* 2001, **305**(3):567-580.
- 1304 136. Zhang H, Yohe T, Huang L, Entwistle S, Wu P, Yang Z, Busk PK, Xu Y, Yin Y: **dbCAN2: a meta**  
1305 **server for automated carbohydrate-active enzyme annotation.** *Nucleic Acids Research* 2018,  
1306 **46**(W1):W95-W101.
- 1307 137. Medema MH, Blin K, Cimermancic P, de Jager V, Zakrzewski P, Fischbach MA, Weber T, Takano  
1308 E, Breitling R: **antiSMASH: rapid identification, annotation and analysis of secondary**  
1309 **metabolite biosynthesis gene clusters in bacterial and fungal genome sequences.** *Nucleic*  
1310 *Acids Research* 2011, **39**(Web Server issue):W339-346.
- 1311 138. Blin K, Medema MH, Kazempour D, Fischbach MA, Breitling R, Takano E, Weber T: **antiSMASH**  
1312 **2.0--a versatile platform for genome mining of secondary metabolite producers.** *Nucleic*  
1313 *Acids Research* 2013, **41**(Web Server issue):W204-212.
- 1314 139. Weber T, Blin K, Duddela S, Krug D, Kim HU, Brucoleri R, Lee SY, Fischbach MA, Müller R,  
1315 Wohlleben W *et al*: **antiSMASH 3.0-a comprehensive resource for the genome mining of**  
1316 **biosynthetic gene clusters.** *Nucleic Acids Research* 2015, **43**(W1):W237-243.
- 1317 140. Blin K, Wolf T, Chevrette MG, Lu X, Schwalen CJ, Kautsar SA, Suarez Duran HG, de Los Santos  
1318 ELC, Kim HU, Nave M *et al*: **antiSMASH 4.0-improvements in chemistry prediction and gene**  
1319 **cluster boundary identification.** *Nucleic Acids Research* 2017, **45**(W1):W36-w41.
- 1320 141. Blin K, Shaw S, Steinke K, Villebro R, Ziemert N, Lee SY, Medema MH, Weber T: **antiSMASH**  
1321 **5.0: updates to the secondary metabolite genome mining pipeline.** *Nucleic Acids Research*  
1322 2019, **47**(W1):W81-W87.

- 1323 142. Blin K, Shaw S, Kloosterman AM, Charlop-Powers Z, van Wezel GP, Medema MH, Weber T:  
1324 **antiSMASH 6.0: improving cluster detection and comparison capabilities.** *Nucleic Acids*  
1325 *Research* 2021, **49**(W1):W29-w35.
- 1326 143. Sperschneider J, Dodds PN: **EffectorP 3.0: prediction of apoplasmic and cytoplasmic effectors**  
1327 **in fungi and oomycetes.** *Molecular Plant-Microbe Interactions* 2022, **35**(2): 146-156.
- 1328 144. Nepusz T, Sasidharan R, Paccanaro A: **SCPS: a fast implementation of a spectral method for**  
1329 **detecting protein families on a genome-wide scale.** *BMC Bioinformatics* 2010, **11**(1):120.
- 1330 145. Wingett SW, Andrews S: **FastQ Screen: A tool for multi-genome mapping and quality control.**  
1331 *F1000Research* 2018, **7**:1338.
- 1332 146. Liao Y, Smyth GK, Shi W: **featureCounts: an efficient general purpose program for assigning**  
1333 **sequence reads to genomic features.** *Bioinformatics* 2014, **30**(7):923-930.
- 1334 147. Ewels P, Magnusson M, Lundin S, Käller M: **MultiQC: summarize analysis results for multiple**  
1335 **tools and samples in a single report.** *Bioinformatics* 2016, **32**(19):3047-3048.
- 1336 148. Love MI, Huber W, Anders S: **Moderated estimation of fold change and dispersion for RNA-**  
1337 **seq data with DESeq2.** *Genome Biology* 2014, **15**(12):550.
- 1338 149. Wickham H: **ggplot2: Elegant graphics for data analysis.** *Springer-Verlag New York* 2016.
- 1339 150. Gu Z, Eils R, Schlesner M: **Complex heatmaps reveal patterns and correlations in**  
1340 **multidimensional genomic data.** *Bioinformatics* 2016, **32**(18):2847-2849.
- 1341 151. Alexa A, Rahnenführer J, Lengauer T: **Improved scoring of functional groups from gene**  
1342 **expression data by decorrelating GO graph structure.** *Bioinformatics* 2006, **22**(13):1600-  
1343 1607.
- 1344 152. Ruff KM, Pappu RV: **AlphaFold and implications for intrinsically disordered proteins.** *Journal*  
1345 *of Molecular Biology* 2021, **433**(20):167208.
- 1346 153. Mirdita M, Ovchinnikov S, Steinegger M: **ColabFold - Making protein folding accessible to all.**  
1347 *bioRxiv* 2021:2021.2008.2015.456425.
- 1348 154. Sievers F, Wilm A, Dineen D, Gibson TJ, Karplus K, Li W, Lopez R, McWilliam H, Remmert M,  
1349 Söding J *et al*: **Fast, scalable generation of high-quality protein multiple sequence alignments**  
1350 **using Clustal Omega.** *Molecular Systems Biology* 2011, **7**(1):539.
- 1351 155. Goujon M, McWilliam H, Li W, Valentin F, Squizzato S, Paern J, Lopez R: **A new bioinformatics**  
1352 **analysis tools framework at EMBL–EBI.** *Nucleic Acids Research* 2010, **38**(suppl\_2):W695-  
1353 W699.
- 1354 156. Zimmermann L, Stephens A, Nam SZ, Rau D, Kübler J, Lozajic M, Gabler F, Söding J, Lupas AN,  
1355 Alva V: **A completely reimplemented MPI bioinformatics toolkit with a new HHpred server**  
1356 **at its core.** *Journal of Molecular Biology* 2018, **430**(15):2237-2243.
- 1357 157. Gabler F, Nam SZ, Till S, Mirdita M, Steinegger M, Söding J, Lupas AN, Alva V: **Protein Sequence**  
1358 **Analysis Using the MPI Bioinformatics Toolkit.** *Current Protocol Bioinformatics* 2020,  
1359 **72**(1):e108.
- 1360 158. Necci M, Piovesan D, Dosztányi Z, Tosatto SCE: **MobiDB-lite: fast and highly specific**  
1361 **consensus prediction of intrinsic disorder in proteins.** *Bioinformatics* 2017, **33**(9):1402-1404.
- 1362 159. Ishida T, Kinoshita K: **PrDOS: prediction of disordered protein regions from amino acid**  
1363 **sequence.** *Nucleic Acids Research* 2007, **35**(Web Server issue):W460-464.
- 1364 160. Shindyalov IN, Bourne PE: **Protein structure alignment by incremental combinatorial**  
1365 **extension (CE) of the optimal path.** *Protein Engineering* 1998, **11**(9):739-747.
- 1366 161. Zhang Y, Skolnick J: **TM-align: a protein structure alignment algorithm based on the TM-**  
1367 **score.** *Nucleic Acids Research* 2005, **33**(7):2302-2309.
- 1368 162. Ayoub R, Lee Y: **RUPEE: A fast and accurate purely geometric protein structure search.** *PLOS*  
1369 *ONE* 2019, **14**(3):e0213712.
- 1370 163. Ayoub R, Lee Y: **Protein structure search to support the development of protein structure**  
1371 **prediction methods.** *Proteins: Structure, Function, and Bioinformatics* 2021, **89**(6):648-658.

- 1372 164. Chandonia J-M, Fox NK, Brenner SE: **SCOPE: classification of large macromolecular structures**  
1373 **in the structural classification of proteins—extended database.** *Nucleic Acids Research* 2019,  
1374 **47(D1):D475-D481.**  
1375
